# Supplementary material for: Keggin structure heteropolyacid-catalyzed phosphinylation of secondary propargyl alcohols with phosphine oxides to γ-ketophosphine oxides
Source: Royal Society of Chemistry journal article supplement (doi:10.1039/d4cc02195a), 2024-01-01
Supplement: d4cc02195a1.pdf [file d4cc02195a1.pdf]

## Supporting Information

**Keggin structure heteropolyacids-catalyzed phosphinylation of secondary propargyl alcohols with phosphine oxides to  $\gamma$ -ketophosphine oxides**

Yang Yang, Shuyan Liang, Hongfeng Zhuang, Feng Han,\* Wenxuan Zhang, Chengxia Miao\*

Key Laboratory of Low-Carbon and Green Agriculture Chemistry in Universities of Shandong, College of Chemistry and Material Science, Shandong Agricultural University, Tai'an 271018, Shandong, China

Email: fenghan@sdau.edu.cn; chxmiao@sdau.edu.cn

# Contents

|                                                              |    |
|--------------------------------------------------------------|----|
| Optimization of Reaction Conditions.....                     | 3  |
| Testing the Content of Water in Catalysts.....               | 4  |
| The HRMS of 3a with <sup>18</sup> O Isotopic Labelling ..... | 5  |
| Experimental Details .....                                   | 6  |
| Characterization Data of the Products .....                  | 7  |
| The NMR Spectra of the Products.....                         | 12 |

## 1. Optimization of Reaction Conditions

**Table S1.** Optimization of the reaction conditions.<sup>[a]</sup>

| Entry | Cat. (mol%) | T (°C) | Yield (%) <sup>[b]</sup> |
|-------|-------------|--------|--------------------------|
| 1     | 4.5         | 120    | 72                       |
| 2     | 0.9         | 120    | 52                       |
| 3     | 2.7         | 120    | 62                       |
| 4     | 9           | 120    | 64                       |
| 5     | 4.5         | rt     | NR <sup>[c]</sup>        |
| 6     | 4.5         | 40     | trace                    |
| 7     | 4.5         | 60     | 20                       |
| 8     | 4.5         | 80     | 59                       |
| 9     | 4.5         | 100    | 60                       |
| 10    | 4.5         | 140    | 69                       |

<sup>[a]</sup> Reaction condition: **1a** (0.6 mmol), **2a** (0.3 mmol) and H<sub>3</sub>PW<sub>12</sub>O<sub>40</sub>·15H<sub>2</sub>O (4.5 mol%) dissolved in DMC (2 mL) were stirred at T °C for 18 h under argon. <sup>[b]</sup> Isolated yield. <sup>[c]</sup> NR: No reaction.

**Table S2.** Investigation of the activity between 1,3-diphenylprop-2-yn-1-ol and dimethylphosphine oxide.<sup>[a]</sup>

| Entry | Cat. (mol%) | T (°C) | t (h) | Yield (%)         |
|-------|-------------|--------|-------|-------------------|
| 1     | 4.5         | 120    | 12    | NR <sup>[b]</sup> |
| 2     | 9           | 120    | 12    | NR <sup>[b]</sup> |
| 3     | 4.5         | 120    | 14    | NR <sup>[b]</sup> |
| 4     | 4.5         | 120    | 16    | NR <sup>[b]</sup> |
| 5     | 4.5         | 140    | 12    | NR <sup>[b]</sup> |

<sup>[a]</sup> Reaction condition: **1a** (0.6 mmol), **2a** (0.3 mmol) and H<sub>3</sub>PW<sub>12</sub>O<sub>40</sub>·15H<sub>2</sub>O (y mol%) dissolved in DMC (2 mL) were stirred at T °C for certain time under argon. <sup>[b]</sup> NR: No reaction.

## 2. Testing the Content of Water in Catalysts

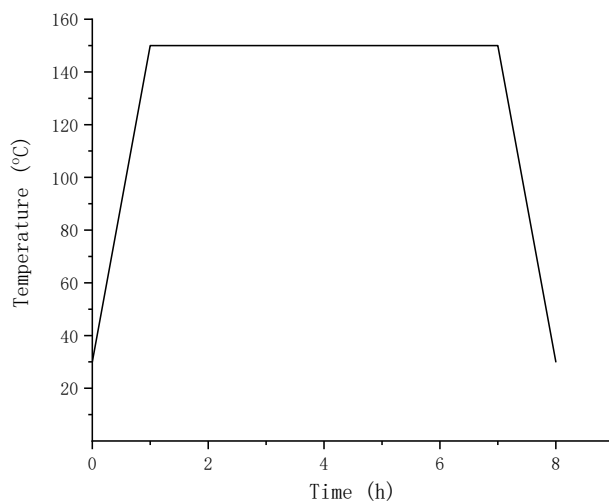

**Figure S1.** The procedure for losing the water molecules in muffle furnace (Initial temperature: 30 °C, from 30 to 150 °C at 5 °C/min, holding for 6 h, then cooling from 150 to 30 °C at 5 °C/min).

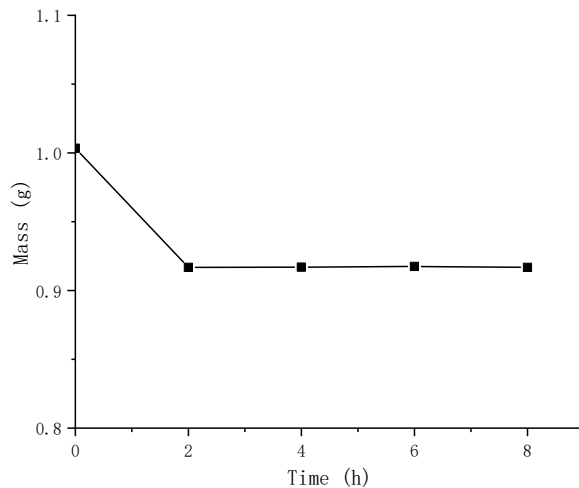

**Figure S2.** Weight change of phosphotungstic acid at 150 °C for different hours (Initial weight of phosphotungstic acid: 1.0034 g, at 150 °C holding for 2 h, terminal weight: 0.9168 g; t = 4 h, terminal weight: 0.9170 g; t = 6 h, terminal weight: 0.9175 g; t = 8 h, terminal weight: 0.9168 g; According to the data, the number of water molecules in  $\text{H}_3\text{PW}_{12}\text{O}_{40}$  is about 15 through calculation).

Initial weight of phosphomolybdic acid: 1.0101 g, at 150 °C holding for 2 h, terminal weight: 0.9065 g; According to the data, the number of water molecules in  $\text{H}_3\text{P}_4\text{Mo}_{12}\text{O}_{40}$  is about 11 through calculation.

### 3. The HRMS of 3a with $^{18}\text{O}$ Isotopic Labelling

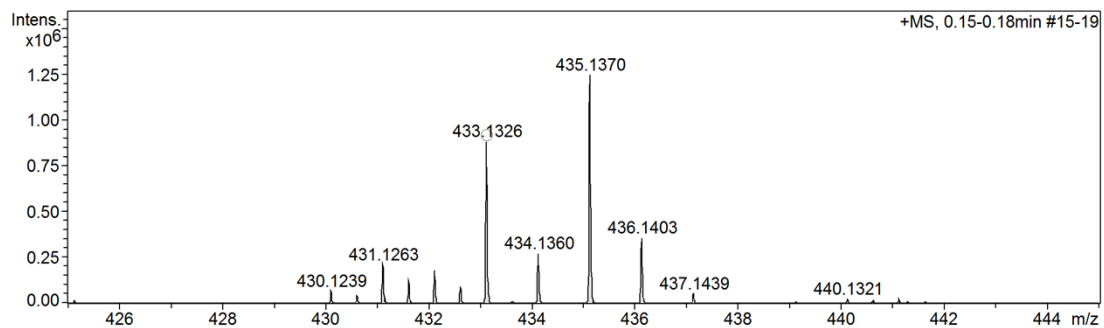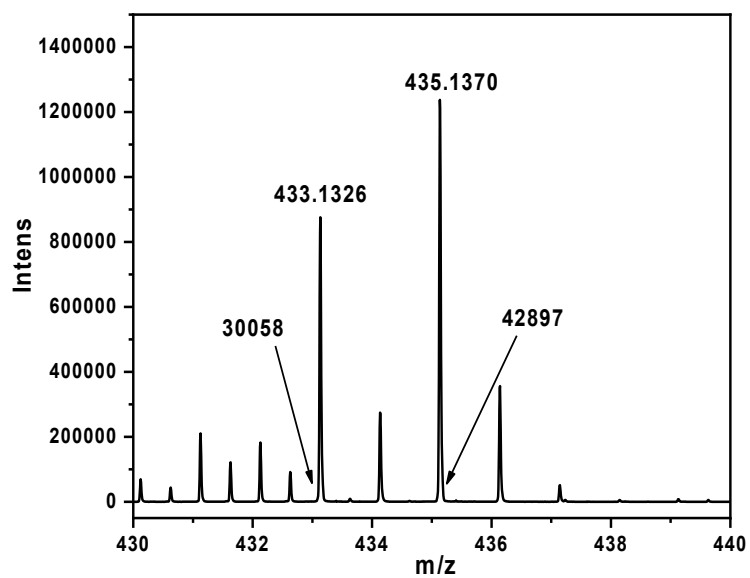

**Figure S3.** The HRMS of **3a** with  $^{18}\text{O}$  isotopic labelling detected in the reaction of Scheme **6b**.

## 4. Experimental Details

### General Information

All chemical reagents and catalysts etc. were purchased from Maklin Biochemical Co., Ltd. and used without further purification. Analytical thin-layer chromatography (TLC) plates produced from Qingdao Hailang were bought. Aluminum oxide (200-300) from Sinopharm Chemical Reagent Co., Ltd. was used for column chromatography, and the eluent was a mixture of ethyl acetate and dichloromethane. Unless noted, a Schlenk tube purchased from the Synthware Glass company was the main reaction vessel.  $^1\text{H}$  NMR,  $^{13}\text{C}$  NMR, and  $^{31}\text{P}$  NMR were recorded on a Bruker AVANCE III 400 MHz spectrometer in  $\text{CDCl}_3$ .  $\text{CDCl}_3$  residual signals were used as an internal standard. Chemical shift values ( $\delta$ ) are reported in ppm and coupling constants ( $J$  values) are reported in Hertz (Hz). A Bruker micrOTOF-QII mass spectrometer with an ESI source was used to give High-resolution mass spectra (HRMS).

### General Procedure for the Synthesis of Propargyl Alcohols

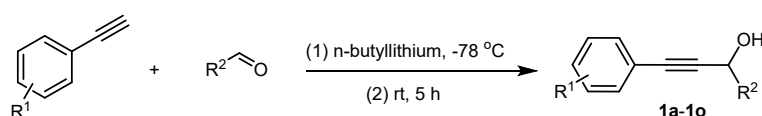

To a stirring solution of alkyne (2.5 mmol) in THF (10 mL) was added dropwise  $n$ -butyllithium (2.5 mmol in THF) at  $-78\text{ }^\circ\text{C}$ . Then, aldehyde (5 mmol) was added dropwise with stirring at room temperature after 5 h and determined by TLC. After the reaction was completed, the mixture was quenched with saturated ammonium chloride (10 mL), and extracted with ethyl acetate ( $3\times 15\text{ mL}$ ). The combined organic layer was dried with  $\text{Na}_2\text{SO}_4$  and concentrated under reduced pressure. The crude material was purified by column chromatography on silica gel using petroleum ether/ethyl acetate to obtain the pure product propargyl alcohols **1a**,<sup>S1</sup> **1b**,<sup>S2</sup> **1c**,<sup>S3</sup> **1d**,<sup>S4</sup> **1e-1g**,<sup>S5</sup> **1h**,<sup>S6</sup> **1i-1l**,<sup>S7</sup> **1m-1n**,<sup>S8</sup> **1o**.<sup>S9</sup>

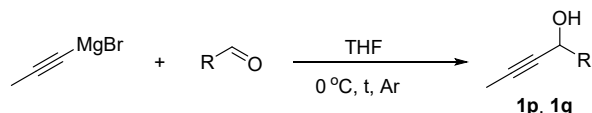

To a stirring solution of 1-propynylmagnesium bromide (2.5 mmol) in THF (10 mL) was added dropwise aldehyde (2.5 mmol) dissolved in THF at  $0\text{ }^\circ\text{C}$ . Then, the mixture was stirred and warmed to room temperature over certain hours, and determined by TLC. After the reaction was completed, the mixture was quenched with saturated ammonium chloride (10 mL), and extracted with ether ( $3\times 15\text{ mL}$ ). The combined organic layer was dried with  $\text{Na}_2\text{SO}_4$  and concentrated under reduced pressure. The crude material was purified by column chromatography on silica gel using petroleum ether/ethyl acetate to obtain the pure product propargyl alcohols **1p**,<sup>S10</sup> and **1q**.<sup>S11</sup>

### General Procedure for the Synthesis of $\gamma$ -Ketophosphine Oxides

Propargyl alcohol **1** (125.1 mg, 0.6 mmol) and **2** (60.6 mg, 0.3 mmol) dissolved in DMC (2 mL) were added a certain amount of catalyst and  $\text{H}_2\text{O}$  (140  $\mu\text{L}$ ) under argon. The above system was stirred for several hours at a definite temperature and monitored by TLC. After the reaction was over, the mixture was extracted with dichloromethane and concentrated under a vacuum. The crude product was purified by aluminum oxide (200–300 mesh) with dichloromethane/ethyl acetate as eluent.

## 5. Characterization Data of the Products

**3-(Diphenylphosphoryl)-1,3-diphenylpropan-1-one (3a):**<sup>S12</sup> 85% yield, 105 mg; white solid, melting points: 246.1 °C-246.5 °C; <sup>1</sup>H NMR (400 MHz, CDCl<sub>3</sub>) δ 8.05 – 7.95 (m, 2H), 7.84 (d, *J* = 7.7 Hz, 2H), 7.58 – 7.42 (m, 6H), 7.41 – 7.29 (m, 5H), 7.25 (d, *J* = 7.3 Hz, 2H), 7.13 (dt, *J* = 13.8, 7.2 Hz, 3H), 4.47 (t, *J* = 8.6 Hz, 1H), 4.03 (ddd, *J* = 18.0, 10.4, 4.2 Hz, 1H), 3.39 (dd, *J* = 18.2, 11.2 Hz, 1H); <sup>13</sup>C NMR (101 MHz, CDCl<sub>3</sub>) δ 196.7 (d, *J*<sub>C-P</sub>=13.1 Hz), 136.4, 136.0 (d, *J*<sub>C-P</sub>=6.1 Hz), 133.3, 132.0 (d, *J*<sub>C-P</sub>=3.0 Hz), 131.4 (d, *J*<sub>C-P</sub>=4.1 Hz), 131.3 (d, *J*<sub>C-P</sub>=4.1 Hz), 131.0 (d, *J*<sub>C-P</sub>=9.1 Hz), 129.8 (d, *J*<sub>C-P</sub>=6.1 Hz), 129.0, 128.9, 128.5, 128.3 (d, *J*<sub>C-P</sub>=2.0 Hz), 128.1 (d, *J*<sub>C-P</sub>=2.0 Hz), 128.0, 127.1 (d, *J*<sub>C-P</sub>=2.0 Hz), 41.1 (d, *J*<sub>C-P</sub>=68.0 Hz), 39.0; <sup>31</sup>P NMR (162 MHz, CDCl<sub>3</sub>) δ 34.57.

**3-(Diphenylphosphoryl)-1-phenyl-3-(2-tolyl)propan-1-one (3b):**<sup>S12</sup> 54% yield, 71 mg; white solid, melting points: 205.3 °C-205.9 °C; <sup>1</sup>H NMR (400 MHz, CDCl<sub>3</sub>) δ 8.01 (ddd, *J* = 10.0, 6.2, 2.1 Hz, 2H), 7.87 – 7.75 (m, 3H), 7.57 (tt, *J* = 4.3, 2.7 Hz, 3H), 7.50 – 7.44 (m, 1H), 7.40 – 7.30 (m, 3H), 7.25 – 7.13 (m, 5H), 7.08 – 7.02 (m, 1H), 6.89 (d, *J* = 7.5 Hz, 1H), 4.67 (ddd, *J* = 10.0, 7.2, 2.4 Hz, 1H), 4.07 (ddd, *J* = 18.2, 10.2, 4.4 Hz, 1H), 3.41 (ddd, *J* = 18.2, 11.1, 2.4 Hz, 1H), 2.06 (s, 3H); <sup>13</sup>C NMR (101 MHz, CDCl<sub>3</sub>) δ 196.9 (d, *J*<sub>C-P</sub>=14.1 Hz), 137.4 (d, *J*<sub>C-P</sub>=6.1 Hz), 136.4, 134.4 (d, *J*<sub>C-P</sub>=5.1 Hz), 133.3, 132.4, 132.2 (d, *J*<sub>C-P</sub>=3.1 Hz), 131.7 (d, *J*<sub>C-P</sub>=8.1 Hz), 131.5 (d, *J*<sub>C-P</sub>=2.1 Hz), 131.45, 131.0 (d, *J*<sub>C-P</sub>=9.1 Hz), 130.05, 129.0 (d, *J*<sub>C-P</sub>=11.0 Hz), 128.8, 128.5, 128.1, 127.8 (d, *J*<sub>C-P</sub>=12.1 Hz), 127.1 (d, *J*<sub>C-P</sub>=3.0 Hz), 126.2 (d, *J*<sub>C-P</sub>=2.0 Hz), 39.9, 36.1 (d, *J*<sub>C-P</sub>=68.7 Hz), 19.6; <sup>31</sup>P NMR (162 MHz, CDCl<sub>3</sub>) δ 34.95.

**3-(Diphenylphosphoryl)-1-phenyl-3-(3-tolyl)propan-1-one (3c):**<sup>S12</sup> 65% yield, 83 mg; white solid, melting points: 231.2 °C-231.7 °C; <sup>1</sup>H NMR (400 MHz, CDCl<sub>3</sub>) δ 7.97 (tt, *J* = 7.9, 2.3 Hz, 2H), 7.90 – 7.78 (m, 2H), 7.54 – 7.42 (m, 6H), 7.40 – 7.30 (m, 3H), 7.27 – 7.23 (m, 2H), 7.20 – 7.12 (m, 2H), 7.03 (t, *J* = 7.5 Hz, 1H), 6.90 (d, *J* = 7.5 Hz, 1H), 4.44 (ddd, *J* = 10.0, 7.1, 2.5 Hz, 1H), 3.99 (ddd, *J* = 18.1, 10.2, 4.4 Hz, 1H), 3.39 (ddd, *J* = 18.1, 11.4, 2.6 Hz, 1H), 2.19 (s, 3H); <sup>13</sup>C NMR (101 MHz, CDCl<sub>3</sub>) δ 196.8 (d, *J*<sub>C-P</sub>=13.1 Hz), 136.8 (d, *J*<sub>C-P</sub>=3.0 Hz), 136.5, 133.5, 132.8 (d, *J*<sub>C-P</sub>=6.1 Hz), 132.1 (d, *J*<sub>C-P</sub>=2.0 Hz), 131.5 (d, *J*<sub>C-P</sub>=3.0 Hz), 131.4 (d, *J*<sub>C-P</sub>=9.1 Hz), 131.2 (d, *J*<sub>C-P</sub>=9.1 Hz), 129.8 (d, *J*<sub>C-P</sub>=6.1 Hz), 129.2 (d, *J*<sub>C-P</sub>=2.0 Hz), 129.1, 129.0, 128.7, 128.3 (d, *J*<sub>C-P</sub>=3.0 Hz), 128.2, 40.6 (d, *J*<sub>C-P</sub>=70.0 Hz), 39.2, 21.2; <sup>31</sup>P NMR (162 MHz, CDCl<sub>3</sub>) δ 34.43.

**3-(Diphenylphosphoryl)-3-(4-ethylphenyl)-1-phenylpropan-1-one (3d):**<sup>S13</sup> 65% yield, 83 mg; white solid, melting points: 210.9 °C-211.5 °C; <sup>1</sup>H NMR (400 MHz, CDCl<sub>3</sub>) δ 8.01 – 7.93 (m, 2H), 7.86 – 7.81 (m, 2H), 7.55 – 7.42 (m, 6H), 7.40 – 7.30 (m, 3H), 7.30 – 7.21 (m, 4H), 6.97 (d, *J* = 7.9 Hz, 2H), 4.46 (ddd, *J* = 9.7, 6.9, 2.4 Hz, 1H), 4.05 – 3.95 (m, 1H), 3.37 (ddd, *J* = 18.2, 11.3, 2.4 Hz, 1H), 2.56 – 2.45 (m, 2H), 1.11 (t, *J* = 7.6 Hz, 3H); <sup>13</sup>C NMR (101 MHz, CDCl<sub>3</sub>) δ 196.9 (d, *J*<sub>C-P</sub>=13.1 Hz), 143.0 (d, *J*<sub>C-P</sub>=3.0 Hz), 136.5, 133.4, 131.44, 131.35, 131.14, 131.05, 129.8 (d, *J*<sub>C-P</sub>=6.1 Hz), 129.0 (d, *J*<sub>C-P</sub>=9.1 Hz), 128.6, 128.2 (d, *J*<sub>C-P</sub>=3.0 Hz), 128.0, 127.9 (d, *J*<sub>C-P</sub>=2.0 Hz), 41.0 (d, *J*<sub>C-P</sub>=69.7 Hz), 39.1, 28.4, 15.5; <sup>31</sup>P NMR (162 MHz, CDCl<sub>3</sub>) δ 34.43.

**3-(Diphenylphosphoryl)-1-phenyl-3-(4-(trifluoromethyl)phenyl)propan-1-one (3e):**<sup>S12</sup> 44% yield, 63 mg; white solid, melting points: 245.2 °C-245.3 °C; <sup>1</sup>H NMR (400 MHz, CDCl<sub>3</sub>) δ 8.05 – 7.93 (m, 2H), 7.88 – 7.78 (m, 2H), 7.51 (dddd, *J* = 15.0, 11.3, 5.9, 1.5 Hz, 8H), 7.38 (ddd, *J* = 14.8, 7.8, 2.4 Hz, 5H), 7.31 – 7.27 (m, 1H), 7.25 (s, 1H), 4.52 (dd, *J* = 6.7, 3.8 Hz, 1H), 4.01 (ddd, *J* = 18.3, 10.5, 4.3 Hz, 1H), 3.41 (ddd, *J* = 18.3, 10.9, 2.5 Hz, 1H); <sup>13</sup>C NMR (101 MHz, CDCl<sub>3</sub>) δ 196.3 (d, *J*<sub>C-P</sub>=13.1 Hz), 136.1, 133.6, 132.3 (d, *J*<sub>C-P</sub>=3.0 Hz), 131.7 (d, *J*<sub>C-P</sub>=3.0 Hz), 131.2 (d, *J*<sub>C-P</sub>=9.1 Hz), 130.8 (d, *J*<sub>C-P</sub>=9.1 Hz), 130.2 (d, *J*<sub>C-P</sub>=6.1 Hz), 129.1 (d, *J*<sub>C-P</sub>=11.1 Hz), 128.7, 128.3 (d, *J*<sub>C-P</sub>=12.1 Hz), 128.1, 41.1 (d, *J*<sub>C-P</sub>=68.7 Hz), 39.0; <sup>31</sup>P NMR (162 MHz, CDCl<sub>3</sub>) δ 33.73.

**3-(Diphenylphosphoryl)-3-(4-fluorophenyl)-1-phenylpropan-1-one (3f):**<sup>S12</sup> 75% yield, 96 mg; white solid, melting points: 228.5 °C-229.4 °C; <sup>1</sup>H NMR (400 MHz, CDCl<sub>3</sub>) δ 7.98 (ddt, *J* = 9.5, 5.8, 2.1 Hz, 2H), 7.87 – 7.81 (m, 2H), 7.58 – 7.44 (m, 6H), 7.41 – 7.33 (m, 5H), 7.31 – 7.23 (m, 2H), 6.88 – 6.80 (m, 2H), 4.45 (ddd, *J* = 10.6, 6.8, 2.4 Hz, 1H), 3.98 (ddd, *J* = 18.2, 10.6, 4.2 Hz, 1H), 3.35 (ddd, *J* = 18.1, 10.8, 2.4 Hz, 1H); <sup>13</sup>C NMR (101 MHz, CDCl<sub>3</sub>) δ 196.7 (d, *J*<sub>C-P</sub>=13.1 Hz), 163.20 (dd, *J*<sub>C-P</sub>=249.5 Hz, *J*<sub>C-P</sub>=3.0 Hz), 133.6, 132.2 (d, *J*<sub>C-P</sub>=3.0 Hz), 131.8, 131.7 (d, *J*<sub>C-P</sub>=3.0 Hz), 131.5, 131.4 (d, *J*<sub>C-P</sub>=2.0 Hz), 131.4, 131.3, 131.0, 130.9, 129.2 (d, *J*<sub>C-P</sub>=12.1 Hz), 128.7, 128.3 (d, *J*<sub>C-P</sub>=12.1 Hz), 128.2, 115.5 (d, *J*<sub>C-P</sub>=2.0 Hz), 115.3 (d, *J*<sub>C-P</sub>=2.0 Hz), 40.4 (d, *J*<sub>C-P</sub>=69.7 Hz), 39.2; <sup>31</sup>P NMR (162 MHz, CDCl<sub>3</sub>) δ 34.12.

**3-(4-Chlorophenyl)-3-(diphenylphosphoryl)-1-phenylpropan-1-one (3g):**<sup>S12</sup> 69% yield, 92 mg, white solid, melting points: 256.5 °C-256.8 °C; <sup>1</sup>H NMR (400 MHz, CDCl<sub>3</sub>) δ 8.01 – 7.93 (m, 2H), 7.86 – 7.80 (m, 2H), 7.57 – 7.45 (m, 6H), 7.42 – 7.25 (m, 7H), 7.15 – 7.10 (m, 2H), 4.44 (ddd, *J* = 10.6, 6.8, 2.4 Hz, 1H), 3.97 (ddd, *J* = 18.2, 10.6, 4.2 Hz, 1H), 3.36 (ddd, *J* = 18.2, 10.8, 2.4 Hz, 1H); <sup>13</sup>C NMR (101 MHz, CDCl<sub>3</sub>) δ 196.6 (d, *J*<sub>C-P</sub>=13.1 Hz), 136.3, 134.7 (d, *J*<sub>C-P</sub>=6.1 Hz), 133.7, 133.1 (d, *J*<sub>C-P</sub>=2.0 Hz), 132.3 (d, *J*<sub>C-P</sub>=3.0 Hz), 132.0, 131.8 (d, *J*<sub>C-P</sub>=3.0 Hz), 131.4, 131.3 (d, *J*<sub>C-P</sub>=2.0 Hz), 131.2, 131.0 (d, *J*<sub>C-P</sub>=9.1 Hz), 130.8, 129.1 (d, *J*<sub>C-P</sub>=11.1 Hz), 128.7, 128.6 (d, *J*<sub>C-P</sub>=2.0 Hz), 128.4 (d, *J*<sub>C-P</sub>=12.1 Hz), 128.2, 40.6 (d, *J*<sub>C-P</sub>=69.7 Hz), 39.1; <sup>31</sup>P NMR (162 MHz, CDCl<sub>3</sub>) δ 33.82.

**3-(4-Bromophenyl)-3-(diphenylphosphoryl)-1-phenylpropan-1-one (3h):**<sup>S12</sup> 63% yield, 92 mg, white solid, melting points: 257.3 °C-258.3 °C; <sup>1</sup>H NMR (400 MHz, CDCl<sub>3</sub>) δ 8.01 – 7.93 (m, 2H), 7.86 – 7.80 (m, 2H), 7.57 – 7.45 (m, 6H), 7.42 – 7.25 (m, 7H), 7.15 – 7.10 (m, 2H), 4.44 (ddd, *J* = 10.6, 6.8, 2.4 Hz, 1H), 3.97 (ddd, *J* = 18.2, 10.6, 4.2 Hz, 1H), 3.36 (ddd, *J* = 18.2, 10.8, 2.4 Hz, 1H); <sup>13</sup>C NMR (101 MHz, CDCl<sub>3</sub>) δ 196.5 (d, *J*<sub>C-P</sub>=13.1 Hz), 136.3, 135.3 (d, *J*<sub>C-P</sub>=5.5 Hz), 133.6, 132.3 (d, *J*<sub>C-P</sub>=2.0 Hz), 131.8 (d, *J*<sub>C-P</sub>=3.0 Hz), 131.6, 131.5 (d, *J*<sub>C-P</sub>=3.0 Hz), 131.3 (d, *J*<sub>C-P</sub>=8.1 Hz), 131.0, 130.9, 129.2 (d, *J*<sub>C-P</sub>=11.2 Hz), 128.7, 128.4 (d, *J*<sub>C-P</sub>=12.1 Hz), 128.2, 40.6 (d, *J*<sub>C-P</sub>=68.7 Hz), 39.0; <sup>31</sup>P NMR (162 MHz, CDCl<sub>3</sub>) δ 33.68.

**3-(Diphenylphosphoryl)-1-(4-ethylphenyl)-3-phenylpropan-1-one (3i):**<sup>S13</sup> 86% yield, 113 mg, white solid, melting points: 198.2 °C-198.6 °C; <sup>1</sup>H NMR (400 MHz, CDCl<sub>3</sub>) δ 8.02 – 7.94 (m, 2H), 7.86 – 7.81 (m, 2H), 7.56 – 7.42 (m, 6H), 7.40 – 7.31 (m, 3H), 7.30 – 7.21 (m, 4H), 6.97 (d, *J* = 7.9 Hz, 2H), 4.46 (ddd, *J* = 9.7, 6.9, 2.4 Hz, 1H), 4.00 (ddd, *J* = 18.1, 10.3, 4.3 Hz, 1H), 3.37 (ddd, *J* = 18.2, 11.3, 2.4 Hz, 1H), 2.55 – 2.46 (m, 2H), 1.11 (t, *J* = 7.6 Hz, 3H); <sup>13</sup>C NMR (101 MHz, CDCl<sub>3</sub>) δ 196.7 (d, *J*<sub>C-P</sub>=13.1 Hz), 143.0 (d, *J*<sub>C-P</sub>=3.0 Hz), 136.4, 133.3, 132.9 (d, *J*<sub>C-P</sub>=6.1 Hz), 132.3, 131.94 (d, *J*<sub>C-P</sub>=2.0 Hz), 131.3 (d, *J*<sub>C-P</sub>=8.1 Hz), 131.0 (d, *J*<sub>C-P</sub>=11.1 Hz), 129.7 (d, *J*<sub>C-P</sub>=6.0 Hz), 128.9, 128.8, 128.5, 128.1 (d, *J*<sub>C-P</sub>=3.0 Hz), 128.0, 127.8 (d, *J*<sub>C-P</sub>=2.0 Hz), 40.9 (d, *J*<sub>C-P</sub>=69.7 Hz), 39.0, 28.4, 15.4; <sup>31</sup>P NMR (162 MHz, CDCl<sub>3</sub>) δ 34.43.

**3-(Diphenylphosphoryl)-1-(4-fluorophenyl)-3-phenylpropan-1-one (3j):**<sup>S12</sup> 82% yield, 105 mg, white solid, melting points: 225.1 °C-225.3 °C; <sup>1</sup>H NMR (400 MHz, CDCl<sub>3</sub>) δ 7.99 (ddd, *J* = 10.2, 6.3, 2.3 Hz, 2H), 7.92 – 7.82 (m, 2H), 7.56 – 7.41 (m, 5H), 7.40 – 7.30 (m, 3H), 7.28 – 7.20 (m, 2H), 7.13 (dt, *J* = 13.3, 6.5 Hz, 3H), 7.03 (t, *J* = 8.5 Hz, 2H), 4.45 (ddd, *J* = 9.9, 6.9, 2.5 Hz, 1H), 3.98 (ddd, *J* = 18.0, 10.3, 4.6 Hz, 1H), 3.36 (ddd, *J* = 18.0, 11.1, 2.6 Hz, 1H); <sup>13</sup>C NMR (101 MHz, CDCl<sub>3</sub>) δ 195.3 (d, *J*<sub>C-P</sub>=14.1 Hz), 167.2 (d, *J*<sub>C-F</sub>=256.5 Hz), 135.9 (d, *J*<sub>C-P</sub>=6.0 Hz), 132.9 (d, *J*<sub>C-P</sub>=3.0 Hz), 132.2 (d, *J*<sub>C-P</sub>=3.0 Hz), 131.9, 131.6 (d, *J*<sub>C-P</sub>=3.0 Hz), 131.4, 131.3, 131.1, 131.0, 130.9, 130.8, 129.9 (d, *J*<sub>C-P</sub>=5.1 Hz), 129.1 (d, *J*<sub>C-P</sub>=11.1 Hz), 128.4 (d, *J*<sub>C-P</sub>=2.0 Hz), 128.2 (d, *J*<sub>C-P</sub>=9.1 Hz), 127.2 (d, *J*<sub>C-P</sub>=3.0 Hz), 115.8 (d, *J*<sub>C-F</sub>=22.2 Hz), 41.2 (d, *J*<sub>C-P</sub>=69.7 Hz), 39.0; <sup>31</sup>P NMR (162 MHz, CDCl<sub>3</sub>) δ 34.22.

**1-(4-Chlorophenyl)-3-(diphenylphosphoryl)-3-phenylpropan-1-one (3k):**<sup>S12</sup> 69% yield, 92 mg, white solid, melting points: 238.2 °C-239.2 °C; <sup>1</sup>H NMR (400 MHz, CDCl<sub>3</sub>) δ 8.03 – 7.94 (m, 2H), 7.79 – 7.74 (m, 2H), 7.52 (td, *J* = 4.3, 3.7, 2.1 Hz, 3H), 7.45 (ddd, *J* = 11.3, 7.5, 1.4 Hz, 2H), 7.35 (ddd, *J* = 11.7, 7.1, 2.5 Hz, 5H), 7.28 – 7.21 (m, 2H), 7.18 – 7.06 (m, 3H), 4.44 (ddd, *J* = 9.9, 6.9, 2.6 Hz, 1H), 3.96 (ddd, *J* = 18.1,



10.3, 4.7 Hz, 1H), 3.36 (ddd,  $J = 18.1, 11.0, 2.6$  Hz, 1H);  $^{13}\text{C}$  NMR (101 MHz,  $\text{CDCl}_3$ )  $\delta$  195.7(d,  $J_{\text{C-P}}=13.1$  Hz), 140.0, 135.9 (d,  $J_{\text{C-P}}=5.0$  Hz), 134.8, 132.2 (d,  $J_{\text{C-P}}=2.0$  Hz), 131.6 (d,  $J_{\text{C-P}}=3.0$  Hz), 131.4 (d,  $J_{\text{C-P}}=8.1$  Hz), 131.1 (d,  $J_{\text{C-P}}=9.1$  Hz), 129.9 (d,  $J_{\text{C-P}}=6.1$  Hz), 129.6, 129.1, 129.0 (d,  $J_{\text{C-P}}=5.1$  Hz), 128.5 (d,  $J_{\text{C-P}}=2.0$  Hz), 128.3, 128.1, 127.3 (d,  $J_{\text{C-P}}=2.0$  Hz), 41.6 (d,  $J_{\text{C-P}}=69.7$  Hz), 39.1;  $^{31}\text{P}$  NMR (162 MHz,  $\text{CDCl}_3$ )  $\delta$  34.15.

**1-(4-Bromophenyl)-3-(diphenylphosphoryl)-3-phenylpropan-1-one (3l):**<sup>S12</sup> 67% yield, 98 mg, white solid, melting points: 227.1 °C-227.7 °C;  $^1\text{H}$  NMR (400 MHz,  $\text{CDCl}_3$ )  $\delta$  8.02 – 7.94 (m, 2H), 7.72 – 7.66 (m, 2H), 7.52 (ddd,  $J = 8.5, 4.9, 1.8$  Hz, 5H), 7.45 (ddd,  $J = 11.3, 5.3, 3.2$  Hz, 2H), 7.40 – 7.32 (m, 3H), 7.27 – 7.22 (m, 2H), 7.13 (dt,  $J = 12.8, 6.8$  Hz, 3H), 4.43 (ddd,  $J = 9.9, 6.9, 2.6$  Hz, 1H), 3.96 (ddd,  $J = 18.0, 10.3, 4.6$  Hz, 1H), 3.41 – 3.30 (m, 1H);  $^{13}\text{C}$  NMR (101 MHz,  $\text{CDCl}_3$ )  $\delta$  195.9 (d,  $J_{\text{C-P}}=14.1$  Hz), 135.9 (d,  $J_{\text{C-P}}=5.1$  Hz), 135.2, 133.5, 132.1 (d,  $J_{\text{C-P}}=12.1$  Hz), 132.0, 131.6 (d,  $J_{\text{C-P}}=3.0$  Hz), 131.4 (d,  $J_{\text{C-P}}=8.1$  Hz), 131.1 (d,  $J_{\text{C-P}}=9.1$  Hz), 129.9 (d,  $J_{\text{C-P}}=5.1$  Hz), 129.7, 129.1 (d,  $J_{\text{C-P}}=11.1$  Hz), 128.7 (d,  $J_{\text{C-P}}=7.1$  Hz), 128.5 (d,  $J_{\text{C-P}}=2.0$  Hz), 128.3, 128.2, 127.3 (d,  $J_{\text{C-P}}=3.0$  Hz), 41.2 (d,  $J_{\text{C-P}}=68.7$  Hz), 39.0;  $^{31}\text{P}$  NMR (162 MHz,  $\text{CDCl}_3$ )  $\delta$  34.16.

**3-(Diphenylphosphoryl)-1,3-bis(4-ethylphenyl)propan-1-one (3m):** 44% yield, 61 mg, white solid, melting points: 200.7 °C-201.3 °C;  $^1\text{H}$  NMR (400 MHz,  $\text{CDCl}_3$ )  $\delta$  8.01 – 7.94 (m, 2H), 7.81 – 7.74 (m, 2H), 7.55 – 7.42 (m, 5H), 7.37 – 7.31 (m, 1H), 7.30 – 7.21 (m, 4H), 7.21 – 7.17 (m, 2H), 7.01 – 6.94 (m, 2H), 4.46 (ddd,  $J = 10.5, 6.9, 2.4$  Hz, 1H), 3.99 (ddd,  $J = 18.1, 10.4, 4.2$  Hz, 1H), 3.33 (ddd,  $J = 18.1, 11.3, 2.4$  Hz, 1H), 2.64 (q,  $J = 7.6$  Hz, 2H), 2.54 – 2.46 (m, 2H), 1.19 (t,  $J = 7.6$  Hz, 3H), 1.11 (t,  $J = 7.6$  Hz, 3H);  $^{13}\text{C}$  NMR (101 MHz,  $\text{CDCl}_3$ )  $\delta$  196.5 (d,  $J_{\text{C-P}}=13.1$  Hz), 150.5, 143.0 (d,  $J_{\text{C-P}}=3.0$  Hz), 134.3, 133.1 (d,  $J_{\text{C-P}}=6.1$  Hz), 132.5, 132.2, 132.0 (d,  $J_{\text{C-P}}=3.0$  Hz), 131.4 (d,  $J_{\text{C-P}}=12.1$  Hz), 131.1 (d,  $J_{\text{C-P}}=8.1$  Hz), 129.9 (d,  $J_{\text{C-P}}=5.1$  Hz), 129.0 (d,  $J_{\text{C-P}}=9.1$  Hz), 128.5, 128.2 (d,  $J_{\text{C-P}}=4.0$  Hz), 128.1, 127.9 (d,  $J_{\text{C-P}}=2.0$  Hz), 40.6 (d,  $J_{\text{C-P}}=168.7$  Hz), 39.0, 29.0, 28.5, 15.5, 15.3;  $^{31}\text{P}$  NMR (162 MHz,  $\text{CDCl}_3$ )  $\delta$  34.57; HRMS (ESI-TOF)  $m/z$   $[\text{M}+\text{Na}]^+$  calcd for  $\text{C}_{31}\text{H}_{31}\text{O}_2\text{PNa}^+$  489.1954, found 489.1958.

**1,3-Bis(4-chlorophenyl)-3-(diphenylphosphoryl)propan-1-one (3n):** 47% yield, 67 mg, white solid, melting points: 243.9 °C-244.3 °C;  $^1\text{H}$  NMR (400 MHz,  $\text{CDCl}_3$ )  $\delta$  7.98 (dtt,  $J = 10.7, 4.8, 2.0$  Hz, 2H), 7.87 – 7.80 (m, 1H), 7.71 – 7.64 (m, 1H), 7.56 – 7.42 (m, 7H), 7.35 (dddd,  $J = 13.6, 8.0, 4.7, 1.6$  Hz, 4H), 7.26 – 7.20 (m, 2H), 7.13 (q,  $J = 6.1, 5.5$  Hz, 3H), 4.45 (dddd,  $J = 17.3, 10.0, 6.9, 2.6$  Hz, 1H), 3.97 (dddd,  $J = 28.4, 18.0, 10.3, 4.7$  Hz, 1H), 3.46 – 3.28 (m, 1H);  $^{13}\text{C}$  NMR (101 MHz,  $\text{CDCl}_3$ )  $\delta$  195.5 (d,  $J_{\text{C-P}}=14.1$  Hz), 140.2, 134.6 (d,  $J_{\text{C-P}}=2.0$  Hz), 134.5, 133.2 (d,  $J_{\text{C-P}}=3.0$  Hz), 132.3 (d,  $J_{\text{C-P}}=3.0$  Hz), 131.8 (d,  $J_{\text{C-P}}=3.0$  Hz), 131.6, 131.3 (d,  $J_{\text{C-P}}=8.1$  Hz), 131.2 (d,  $J_{\text{C-P}}=6.1$  Hz), 131.0 (d,  $J_{\text{C-P}}=3.0$  Hz), 130.7 (d,  $J_{\text{C-P}}=14.1$  Hz), 129.6, 129.2 (d,  $J_{\text{C-P}}=11.1$  Hz), 129.0, 128.7 (d,  $J_{\text{C-P}}=2.0$  Hz), 128.5, 128.4, 40.6 (d,  $J_{\text{C-P}}=68.7$  Hz), 39.0;  $^{31}\text{P}$  NMR (162 MHz,  $\text{CDCl}_3$ )  $\delta$  33.78; HRMS (ESI) Calcd. for  $\text{C}_{27}\text{H}_{21}\text{Cl}_2\text{O}_2\text{P}$   $[\text{M}+\text{Na}]^+$  501.0548, found 501.0543.

**3-(diphenylphosphoryl)-4,4-dimethyl-1-phenylpentan-1-one (3o):** 69% yield, 80 mg, white solid, melting points: 203.9 °C-204.3 °C;  $^1\text{H}$  NMR (400 MHz,  $\text{CDCl}_3$ )  $\delta$  8.07 – 7.98 (m, 2H), 7.78 – 7.69 (m, 4H), 7.50 – 7.44 (m, 4H), 7.38 – 7.31 (m, 2H), 7.24 – 7.12 (m, 3H), 3.59 (dt,  $J = 6.9, 4.8$  Hz, 1H), 3.41 – 3.14 (m, 2H), 1.03 (s, 9H);  $^{13}\text{C}$  NMR (101 MHz,  $\text{CDCl}_3$ )  $\delta$  197.8 (d,  $J_{\text{C-P}}=7.1$  Hz), 136.1, 133.1, 131.2 (d,  $J_{\text{C-P}}=2.0$  Hz), 131.0 (d,  $J_{\text{C-P}}=2.0$  Hz), 130.8, 130.7, 128.5 (d,  $J_{\text{C-P}}=11.1$  Hz), 128.37, 128.3 (d,  $J_{\text{C-P}}=11.1$  Hz), 127.8, 40.8 (d,  $J_{\text{C-P}}=71.7$  Hz), 35.7 (dd,  $J_{\text{C-P}}=9.1$  Hz,  $J_{\text{C-P}}=2.0$  Hz), 29.8 (d,  $J_{\text{C-P}}=6.1$  Hz);  $^{31}\text{P}$  NMR (162 MHz,  $\text{CDCl}_3$ )  $\delta$  35.06. HRMS (ESI) Calcd. for  $\text{C}_{25}\text{H}_{27}\text{O}_2\text{P}$   $[\text{M}+\text{H}]^+$  391.1821, found 391.1822.

**4-(diphenylphosphoryl)-4-phenylbutan-2-one (3p):** 23% yield, 24 mg, white solid, melting points: 173.7 °C-174.9 °C;  $^1\text{H}$  NMR (400 MHz,  $\text{CDCl}_3$ )  $\delta$  7.93 (ddt,  $J = 10.8, 6.4, 1.7$  Hz, 2H), 7.59 – 7.49 (m, 3H), 7.44 (ddd,  $J = 11.3, 8.3, 1.4$  Hz, 2H), 7.36 – 7.27 (m, 3H), 7.23 (ddd,  $J = 8.5, 6.8, 3.0$  Hz, 2H), 7.19 – 7.08 (m, 3H), 4.22 (ddd,  $J = 10.2, 7.3, 3.0$  Hz, 1H), 3.32 (ddd,  $J = 17.9, 10.1, 5.4$  Hz, 1H), 2.94 (ddd,  $J = 18.0, 11.2, 2.9$  Hz, 1H), 1.95 (s, 3H);  $^{13}\text{C}$  NMR (101 MHz,  $\text{CDCl}_3$ )  $\delta$  205.33 (d,  $J_{\text{C-P}}=13.0$  Hz), 132.0 (d,  $J_{\text{C-P}}=3.0$  Hz), 131.4 (d,  $J_{\text{C-P}}=3.0$  Hz), 131.4, 131.3, 131.0 (d,  $J_{\text{C-P}}=9.0$  Hz), 129.7 (d,  $J_{\text{C-P}}=6.0$  Hz), 128.9 (d,  $J_{\text{C-P}}=11.0$

Hz), 128.3 (d,  $J_{C-P}=2.0$  Hz), 128.06 (d,  $J_{C-P}=12.0$  Hz), 127.1 (d,  $J_{C-P}=2.0$  Hz), 43.6, 41.1 (d,  $J_{C-P}=69.0$  Hz), 30.6;  $^{31}\text{P}$  NMR (162 MHz,  $\text{CDCl}_3$ )  $\delta$  33.68. HRMS (ESI) Calcd. for  $\text{C}_{22}\text{H}_{23}\text{O}_2\text{P}$   $[\text{M}+\text{H}]^+$  351.1508, found 351.1516.

**3-(Di-3-tolylphosphoryl)-1,3-diphenylpropan-1-one (3r)**: 64% yield, 84 mg, white solid, melting points: 165.5°C-166.2°C;  $^1\text{H}$  NMR (400 MHz,  $\text{CDCl}_3$ )  $\delta$  7.88 – 7.79 (m, 3H), 7.77 – 7.69 (m, 1H), 7.48 (d,  $J = 7.3$  Hz, 1H), 7.42 – 7.31 (m, 6H), 7.27 – 7.21 (m, 2H), 7.20 – 7.07 (m, 5H), 4.44 (ddd,  $J = 9.8, 6.8, 2.5$  Hz, 1H), 4.01 (ddd,  $J = 18.1, 10.4, 4.5$  Hz, 1H), 3.40 (dd,  $J = 11.0, 2.5$  Hz, 1H), 2.39 (s, 3H), 2.19 (s, 3H);  $^{13}\text{C}$  NMR (101 MHz,  $\text{CDCl}_3$ )  $\delta$  196.7 (d,  $J_{C-P}=13.1$  Hz), 139.0 (d,  $J_{C-P}=11.1$  Hz), 137.9 (d,  $J_{C-P}=11.1$  Hz), 136.4, 136.1 (d,  $J_{C-P}=5.1$  Hz), 133.4, 132.8 (d,  $J_{C-P}=3.0$  Hz), 132.2 (d,  $J_{C-P}=3.0$  Hz), 132.0 (d,  $J_{C-P}=8.1$  Hz), 131.8 (d,  $J_{C-P}=8.1$  Hz), 129.9 (d,  $J_{C-P}=5.1$  Hz), 128.8 (d,  $J_{C-P}=12.1$  Hz), 128.6, 128.3 (d,  $J_{C-P}=2.0$  Hz), 128.1, 127.9 (d,  $J_{C-P}=2.0$  Hz), 127.0 (d,  $J_{C-P}=3.0$  Hz), 41.1 (d,  $J_{C-P}=68.7$  Hz), 39.0, 21.5, 21.3;  $^{31}\text{P}$  NMR (162 MHz,  $\text{CDCl}_3$ )  $\delta$  34.78; HRMS (ESI) Calcd. for  $\text{C}_{29}\text{H}_{21}\text{O}_2\text{PH}$   $[\text{M}+\text{H}]^+$  439.1821, found 439.1824.

**3-(Bis(4-ethylphenyl)phosphoryl)-1,3-diphenylpropan-1-one (3s)**: 88% yield, 123 mg, white solid, melting points: 215.3°C- 215.9°C;  $^1\text{H}$  NMR (400 MHz,  $\text{CDCl}_3$ )  $\delta$  7.88 – 7.80 (m, 4H), 7.51 – 7.46 (m, 1H), 7.42 – 7.28 (m, 8H), 7.19 – 7.07 (m, 3H), 7.04 (dd,  $J = 8.1, 2.8$  Hz, 2H), 4.42 (ddd,  $J = 9.9, 7.1, 2.4$  Hz, 1H), 4.00 (ddd,  $J = 18.1, 10.4, 4.2$  Hz, 1H), 3.37 (ddd,  $J = 18.1, 11.1, 2.4$  Hz, 1H), 2.37 (s, 3H), 2.26 (s, 3H), 1.28 – 1.24 (m, 2H), 0.91 – 0.86 (m, 2H);  $^{13}\text{C}$  NMR (101 MHz,  $\text{CDCl}_3$ )  $\delta$  196.9 (d,  $J_{C-P}=13.1$  Hz), 142.5 (d,  $J_{C-P}=3.0$  Hz), 141.8 (d,  $J_{C-P}=2.0$  Hz), 136.5, 136.3 (d,  $J_{C-P}=5.1$  Hz), 133.4, 131.4 (d,  $J_{C-P}=8.1$  Hz), 131.1 (d,  $J_{C-P}=9.1$  Hz), 130.0 (d,  $J_{C-P}=5.1$  Hz), 129.8, 129.7, 129.0, 128.9, 128.6, 128.4 (d,  $J_{C-P}=2.0$  Hz), 128.2, 127.1 (d,  $J_{C-P}=2.0$  Hz), 41.3 (d,  $J_{C-P}=9.1$  Hz), 39.3, 31.7, 22.8, 21.7 (dd,  $J_{C-P}=1.0$  Hz, 8.1 Hz), 14.3;  $^{31}\text{P}$  NMR (162 MHz,  $\text{CDCl}_3$ )  $\delta$  34.70; HRMS (ESI) Calcd. for  $\text{C}_{31}\text{H}_{31}\text{O}_2\text{PH}$   $[\text{M}+\text{H}]^+$  467.2134, found 467.2125.

**3-(Bis(4-methoxyphenyl)phosphoryl)-1,3-diphenylpropan-1-one (3t)**:<sup>S13</sup> 66% yield, 93 mg, white solid, melting points: 165.1 °C-165.5 °C;  $^1\text{H}$  NMR (400 MHz,  $\text{CDCl}_3$ )  $\delta$  7.91 – 7.82 (m, 4H), 7.53 – 7.47 (m, 1H), 7.41 – 7.28 (m, 6H), 7.19 – 7.10 (m, 3H), 7.03 – 6.99 (m, 2H), 6.77 – 6.72 (m, 2H), 4.37 (s, 1H), 3.99 (ddd,  $J = 18.2, 10.3, 4.4$  Hz, 1H), 3.83 (s, 3H), 3.74 (s, 3H), 3.40 (ddd,  $J = 18.1, 11.3, 2.5$  Hz, 1H);  $^{13}\text{C}$  NMR (101 MHz,  $\text{CDCl}_3$ )  $\delta$  197.0 (d,  $J_{C-P}=13.1$  Hz), 162.6 (d,  $J_{C-P}=2.0$  Hz), 162.0 (d,  $J_{C-P}=3.0$  Hz), 136.5, 136.4 (d,  $J_{C-P}=5.1$  Hz), 133.4, 133.3 (d,  $J_{C-P}=9.1$  Hz), 133.0 (d,  $J_{C-P}=11.1$  Hz), 130.0 (d,  $J_{C-P}=6.7$  Hz), 128.6, 128.4 (d,  $J_{C-P}=2.0$  Hz), 128.2, 127.1 (d,  $J_{C-P}=2.0$  Hz), 123.8, 123.0, 122.7, 122.0, 114.6 (d,  $J_{C-P}=12.1$  Hz), 113.7 (d,  $J_{C-P}=12.1$  Hz), 55.4 (d,  $J_{C-P}=13.1$  Hz), 42.0, 41.3, 39.2;  $^{31}\text{P}$  NMR (162 MHz,  $\text{CDCl}_3$ )  $\delta$  34.84.

**3-(Bis(4-fluorophenyl)phosphoryl)-1,3-diphenylpropan-1-one (3u)**:<sup>S13</sup> 65% yield, 87 mg, white solid, melting points: 204.5 °C-205.0 °C;  $^1\text{H}$  NMR (400 MHz,  $\text{CDCl}_3$ )  $\delta$  8.01 – 7.94 (m, 2H), 7.87 – 7.82 (m, 2H), 7.54 – 7.48 (m, 1H), 7.45 – 7.34 (m, 6H), 7.26 – 7.10 (m, 5H), 6.94 (td,  $J = 8.7, 2.2$  Hz, 2H), 4.44 (ddd,  $J = 9.7, 6.8, 2.6$  Hz, 1H), 3.98 (ddd,  $J = 18.2, 9.9, 4.9$  Hz, 1H), 3.39 (ddd,  $J = 18.2, 11.9, 2.6$  Hz, 1H);  $^{13}\text{C}$  NMR (101 MHz,  $\text{CDCl}_3$ )  $\delta$  196.5 (d,  $J_{C-P}=13.1$  Hz), 165.0 (d,  $J_{C-F}=254.5$  Hz,  $J_{C-P}=50.5$  Hz), 136.3, 135.8 (d,  $J_{C-P}=6.1$  Hz), 134.0, 133.9, 133.8, 133.6, 133.5 (d,  $J_{C-P}=1.0$  Hz), 133.4, 129.9 (d,  $J_{C-P}=5.1$  Hz), 128.7, 128.6 (d,  $J_{C-P}=2.0$  Hz), 128.2, 127.4 (d,  $J_{C-P}=2.0$  Hz), 116.8, 116.6, 116.6, 116.4, 115.9, 115.7, 115.6, 115.5, 41.4 (d,  $J_{C-P}=70.7$  Hz), 39.0;  $^{31}\text{P}$  NMR (162 MHz,  $\text{CDCl}_3$ )  $\delta$  33.45.

**3-Butyl(phenyl)phosphoryl)-1,3-diphenylpropan-1-one (3v)**: 34% yield, 40 mg, white solid, melting points: 198.6 °C-199.1 °C;  $^1\text{H}$  NMR (400 MHz,  $\text{CDCl}_3$ )  $\delta$  7.83 – 7.77 (m, 4H), 7.56 – 7.46 (m, 6H), 7.35 (td,  $J = 7.9, 6.5$  Hz, 4H), 7.28 (q,  $J = 1.5$  Hz, 1H), 4.01 – 3.83 (m, 2H), 3.19 (ddd,  $J = 17.7, 10.5, 2.2$  Hz, 1H), 1.66 (dddd,  $J = 11.9, 9.9, 6.2, 3.5$  Hz, 2H), 1.37 – 1.23 (m, 2H), 1.19 – 1.14 (m, 2H), 0.71 (t,  $J = 7.1$  Hz, 3H);  $^{13}\text{C}$  NMR (101 MHz,  $\text{CDCl}_3$ )  $\delta$  196.9 (d,  $J_{C-P}=13.1$  Hz), 136.5, 133.4, 132.0, 131.1 (d,  $J_{C-P}=9.1$  Hz), 129.6 (d,  $J_{C-P}=6.1$  Hz), 129.0 (d,  $J_{C-P}=2.0$  Hz), 128.9, 128.7, 128.2, 127.6, 42.2 (d,  $J_{C-P}=66.7$  Hz), 38.72, 28.3 (d,  $J_{C-P}=70.7$  Hz), 24.1 (d,  $J_{C-P}=15.2$  Hz), 23.4 (d,  $J_{C-P}=4.0$  Hz), 13.61. HRMS (ESI-TOF)  $m/z$   $[\text{M}+\text{H}]^+$  calcd for  $\text{C}_{25}\text{H}_{27}\text{O}_2\text{PNa}^+$  413.1641, found 413.1637.

**References:**

- S1 W. M. Yan, Q. Y. Wang, Y. F. Chen, J. L. Petersen and X. D. Shi, *Org. Lett.*, 2010, **12**, 3308-3311.
- S2 V. K. Vyas, R. C. Knighton, B. M. Bhanage and M. Wills, *Org. Lett.*, 2018, **20**, 975-978.
- S3 G. B. Consiglio, Y. Yuan, C. Fressigne, A. H. Marchand, H. Oulyadi and J. Maddaluno, *Organometallics*, 2015, **34**, 4441-4450.
- S4 W. Zhang, Y. Cao, W. Chen, G. Zhao and L. Pu, *Tetrahedron Lett.*, 2015, **56**, 6430-6432.
- S5 Y. Jeong, B. Kim, J. K. Lee and J. S. Ryu, *J. Org. Chem.*, 2014, **79**, 6444-6455.
- S6 P. Liu, C. L. Deng, X. S. Lei and G. Q. Lin, *Eur. J. Org. Chem.*, 2011, 7308-7316.
- S7 T. Li, Z. Q. Wang, K. Xu, W. M. Liu, X. Zhang, W. T. Mao, Y. M. Guo, X. L. Ge and F. Pan, *Org. Lett.*, 2016, **18**, 1064-1067.
- S8 Q. Y. Yao, L. K. Kong, M. D. Wang, Y. Yuan, R. Z. Sun and Y. Z. Li, *Org. Lett.*, 2018, **20**, 1744-1747.
- S9 P. Wessig, G. Mueller, R. Herre and A. Kuehn, *Helv. Chim. Acta.*, 2006, **89**, 2694-2719.
- S10 S. Gonzalez-Granda, D. Mendez-Sanchez, L. Lavandera, V. Gotor-Fernandez, *ChemCatChem*, 2020, **12**, 520-527.
- S11 D. R. T. Morgan, L. M. LeBlanc, H. G. Ardagh, R. J. Boyd and D. J. Burnell, *J. Org. Chem.*, 2015, **80**, 1042-1051.
- S12 C. Shan, F. Chen, J. Pan, Y. Gao, P. Xu and Y. F. Zhao, *J. Org. Chem.*, 2017, **82**, 11659-11666.
- S13 X. Q. Hao, J. J. Huang, T. Wang, J. Lv, J. F. Gong and M. P. Song, *J. Org. Chem.*, 2014, **79**, 9512-9530.

## 6. The NMR Spectra of the Products

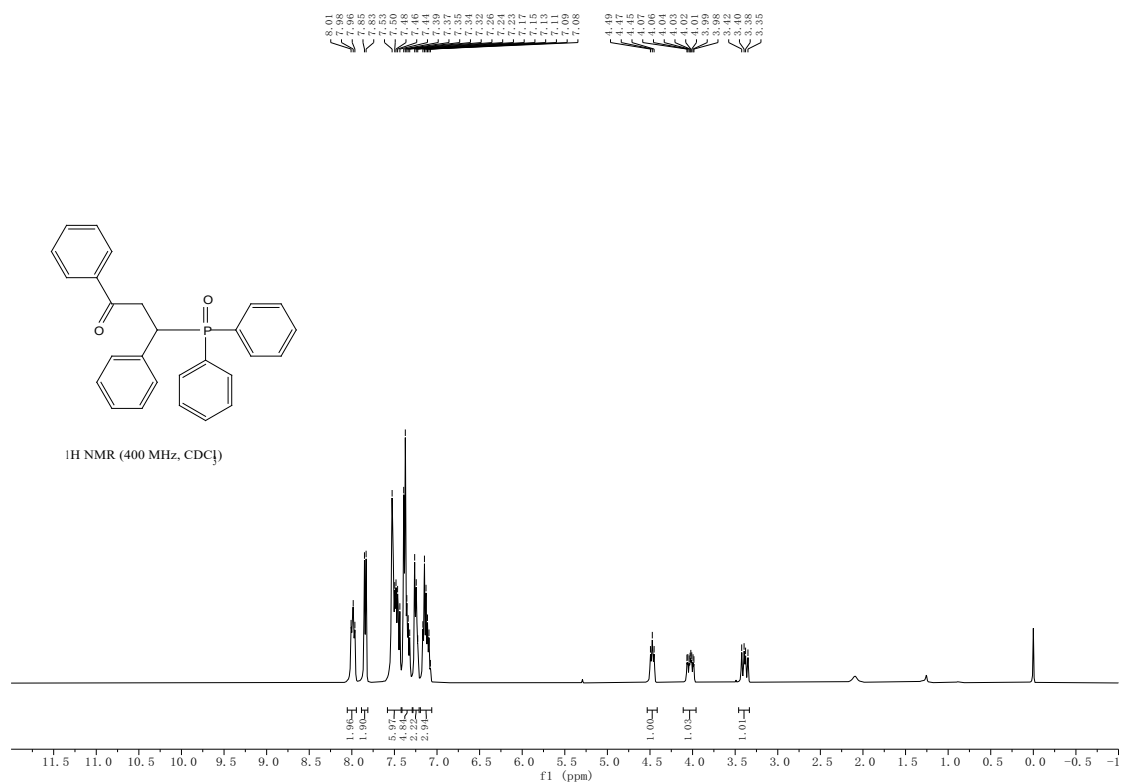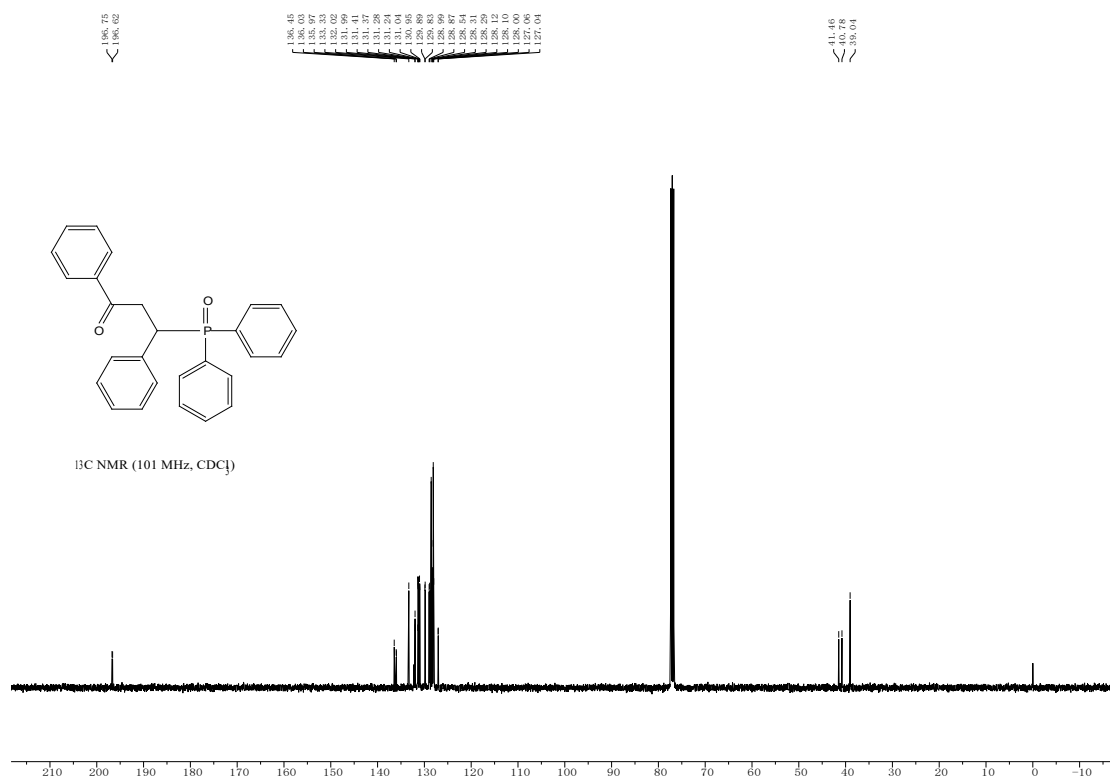

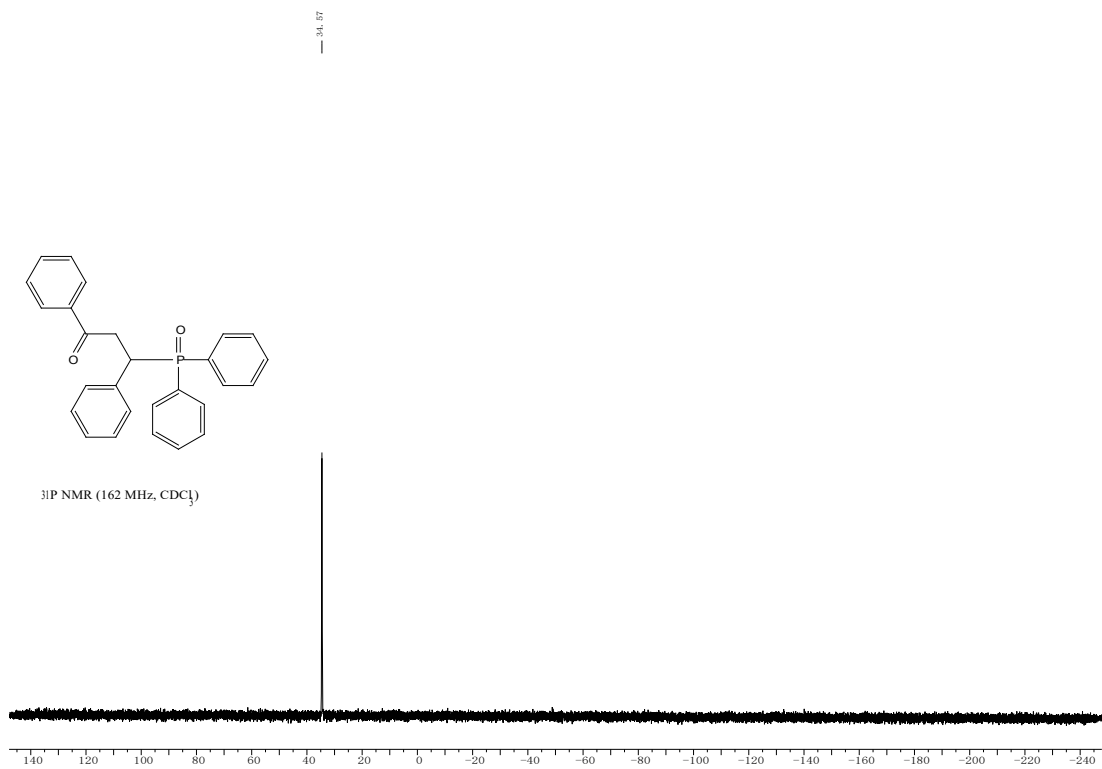

**Figure S4.**  $^1\text{H}$  NMR,  $^{13}\text{C}$  NMR and  $^{31}\text{P}$  NMR spectra of **3a**.



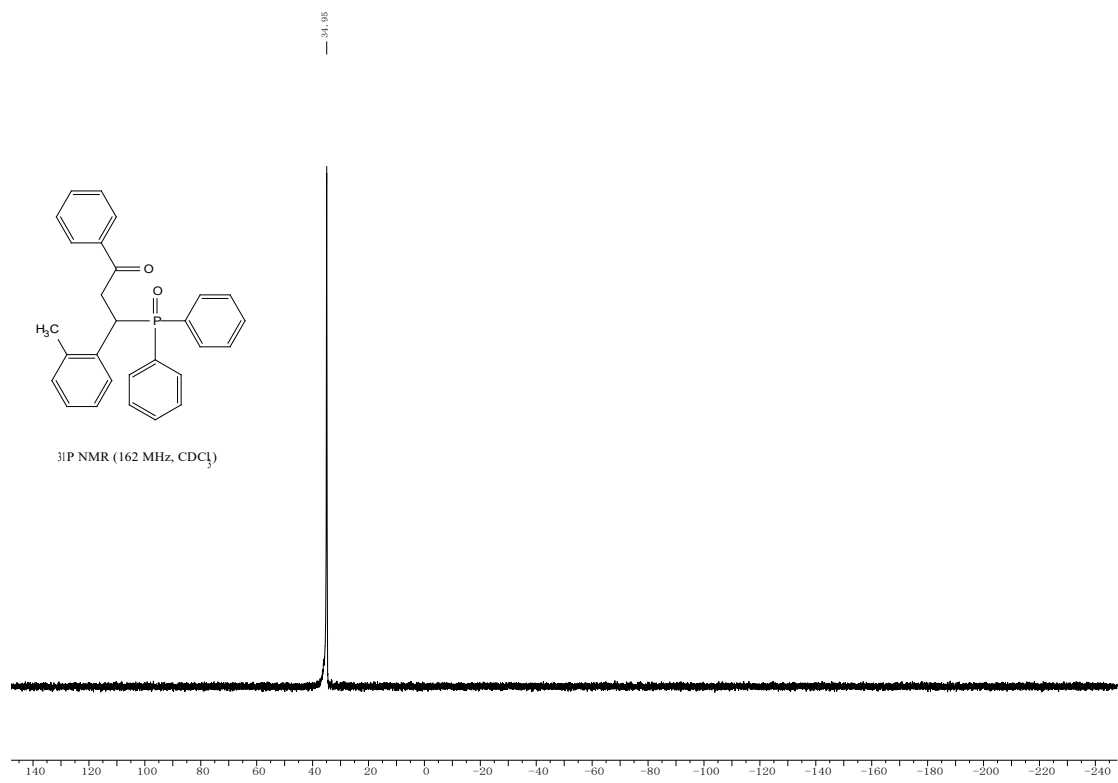

**Figure S5.**  $^1\text{H}$  NMR,  $^{13}\text{C}$  NMR and  $^{31}\text{P}$  NMR spectra of **3b**.

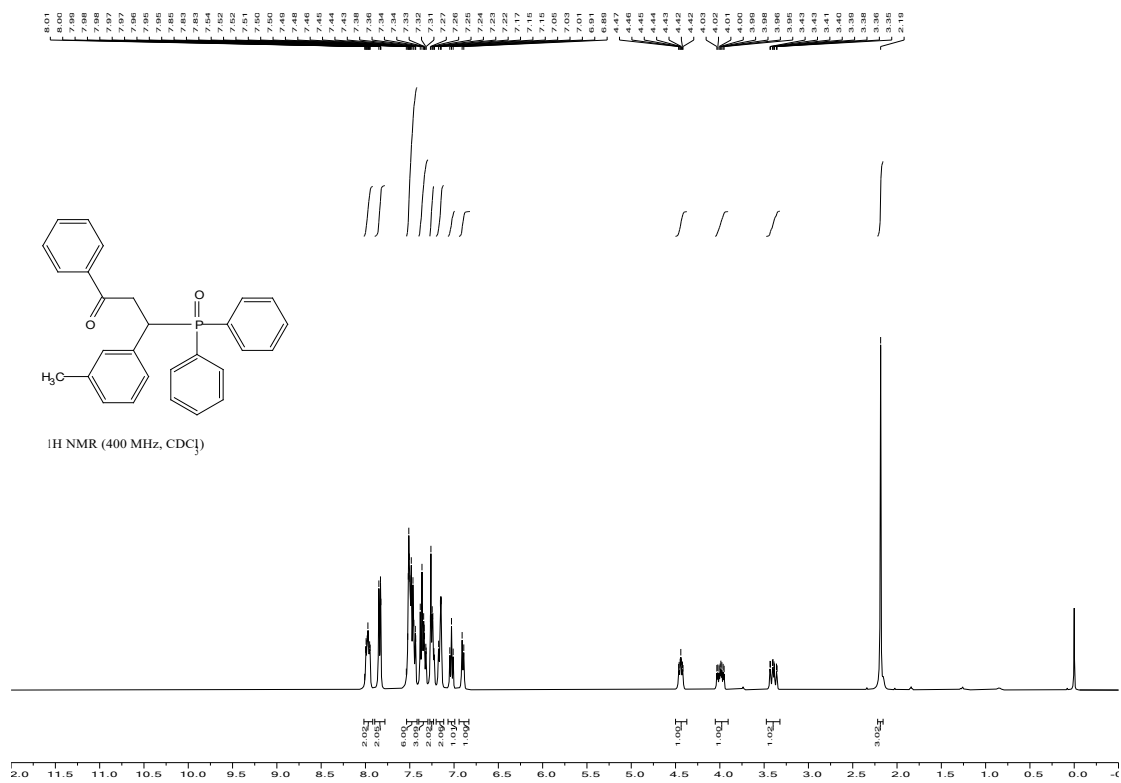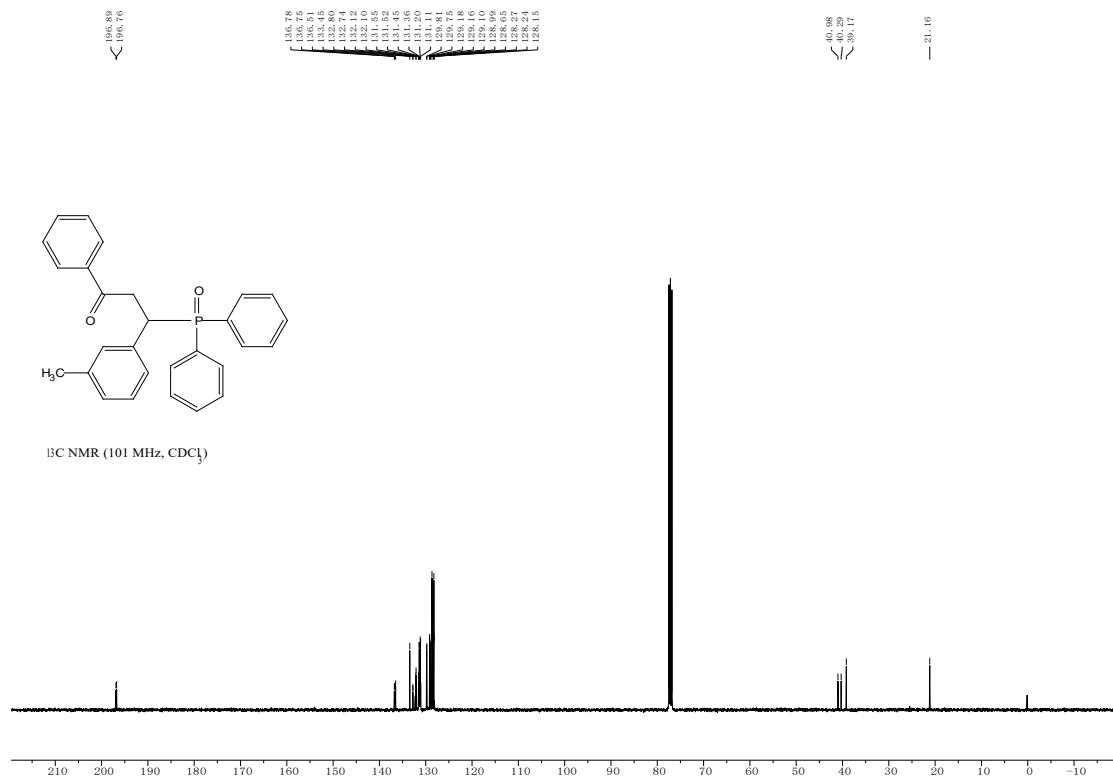



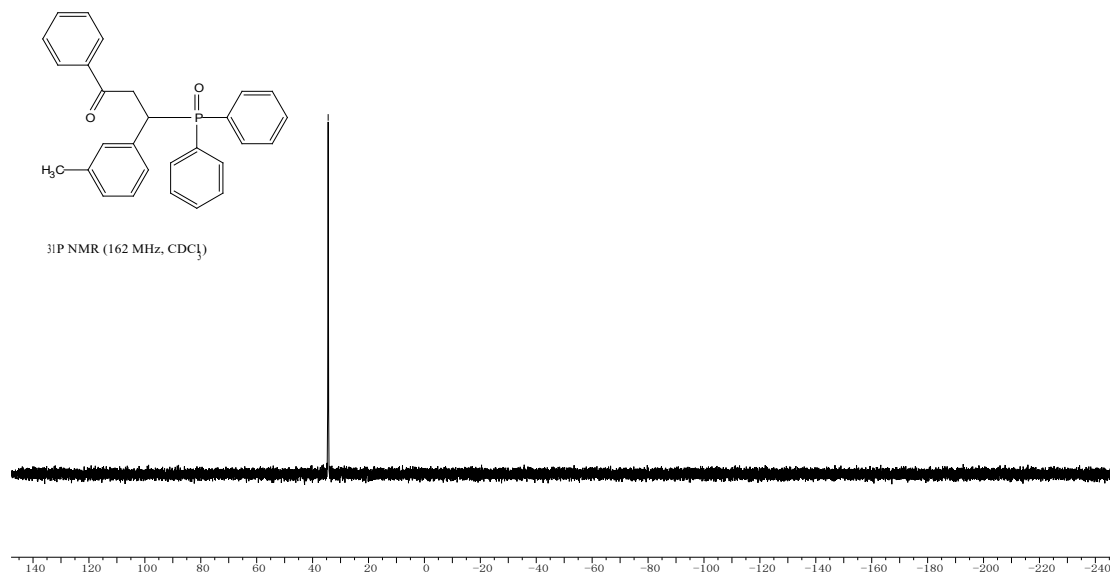

**Figure S6.**  $^1\text{H}$  NMR,  $^{13}\text{C}$  NMR and  $^{31}\text{P}$  NMR spectra of **3c**.



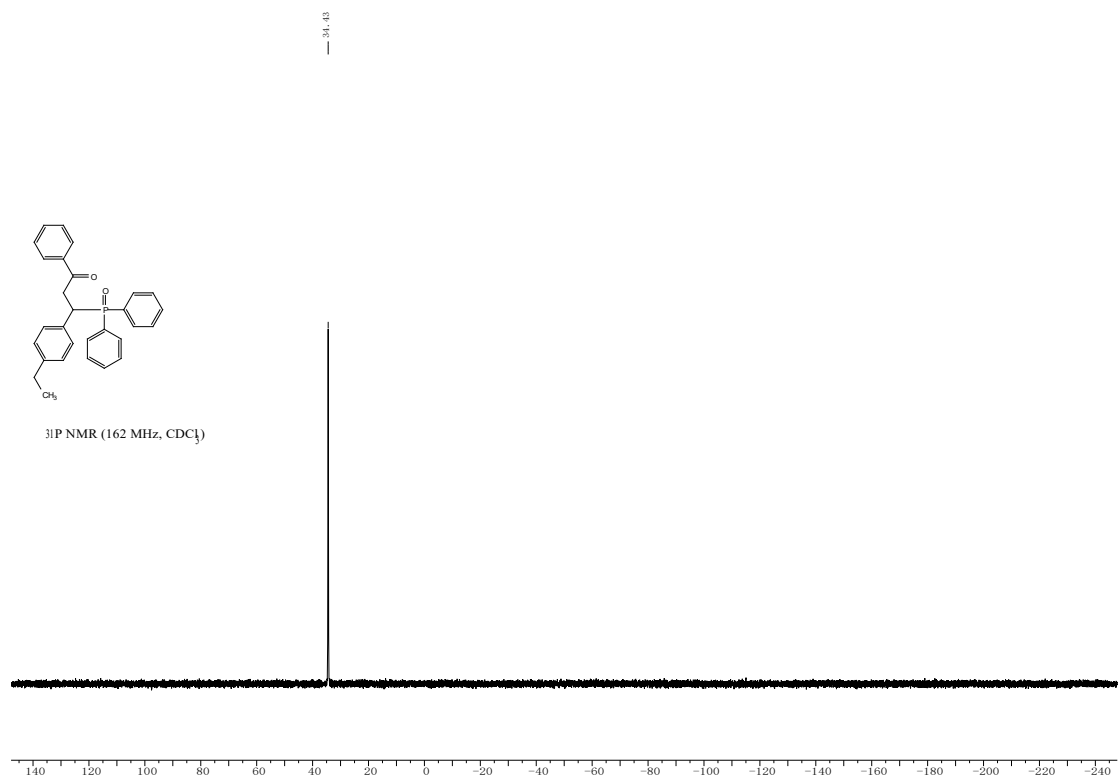

**Figure S7.**  $^1\text{H}$  NMR,  $^{13}\text{C}$  NMR and  $^{31}\text{P}$  NMR spectra of **3d**.



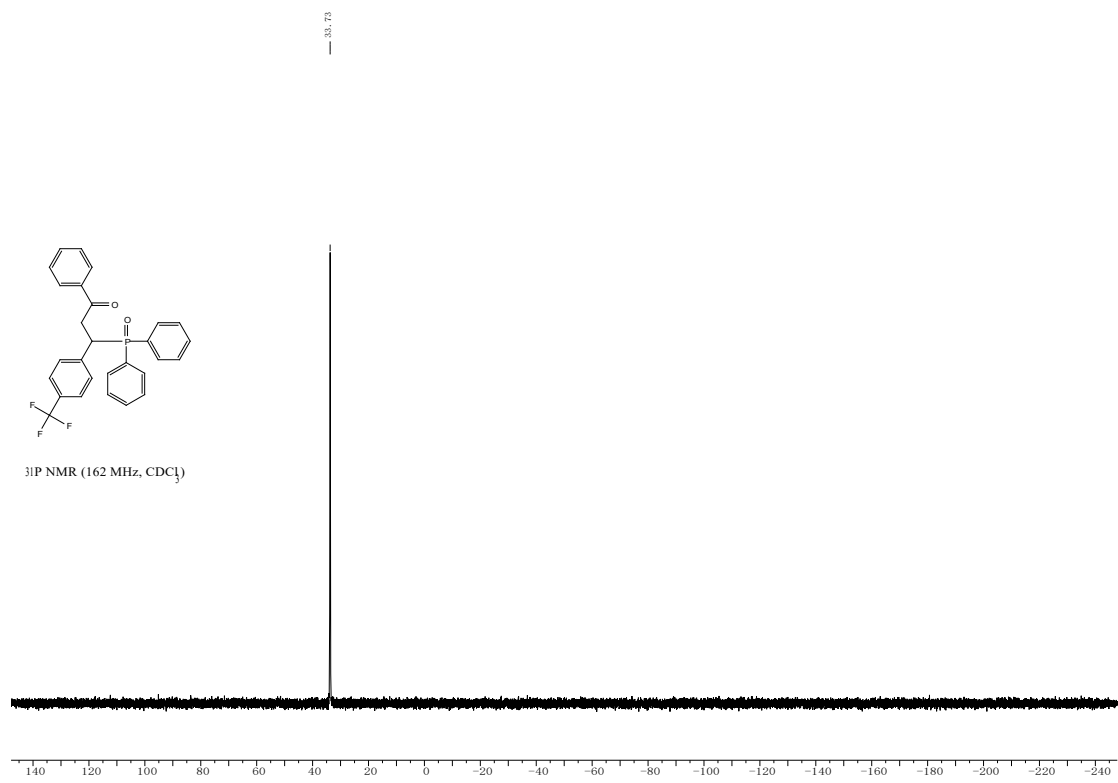

**Figure S8.**  $^1\text{H}$  NMR,  $^{13}\text{C}$  NMR and  $^{31}\text{P}$  NMR spectra of **3e**.



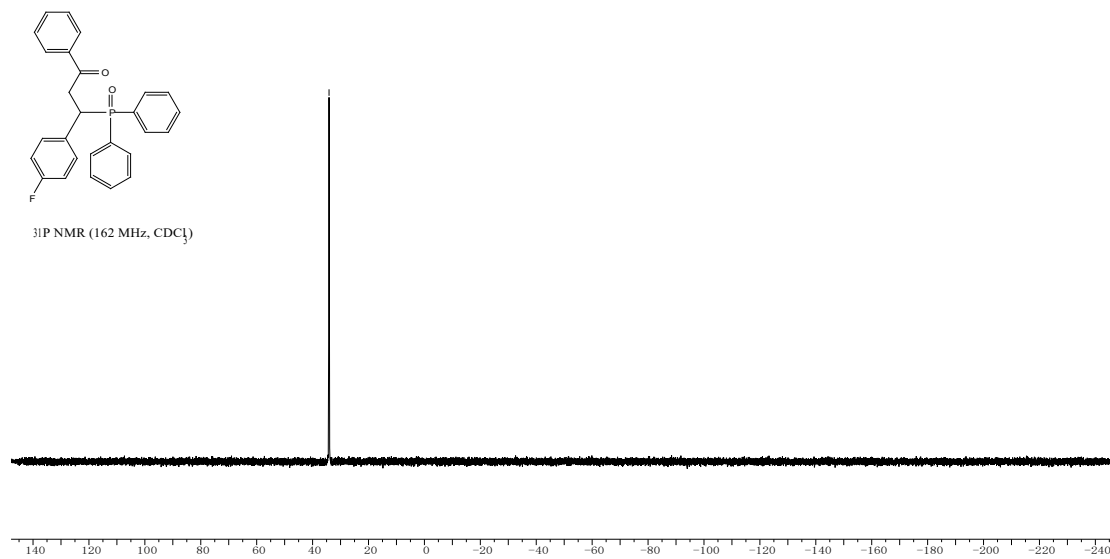

Figure S9. <sup>1</sup>H NMR, <sup>13</sup>C NMR and <sup>31</sup>P NMR spectra of **3f**.





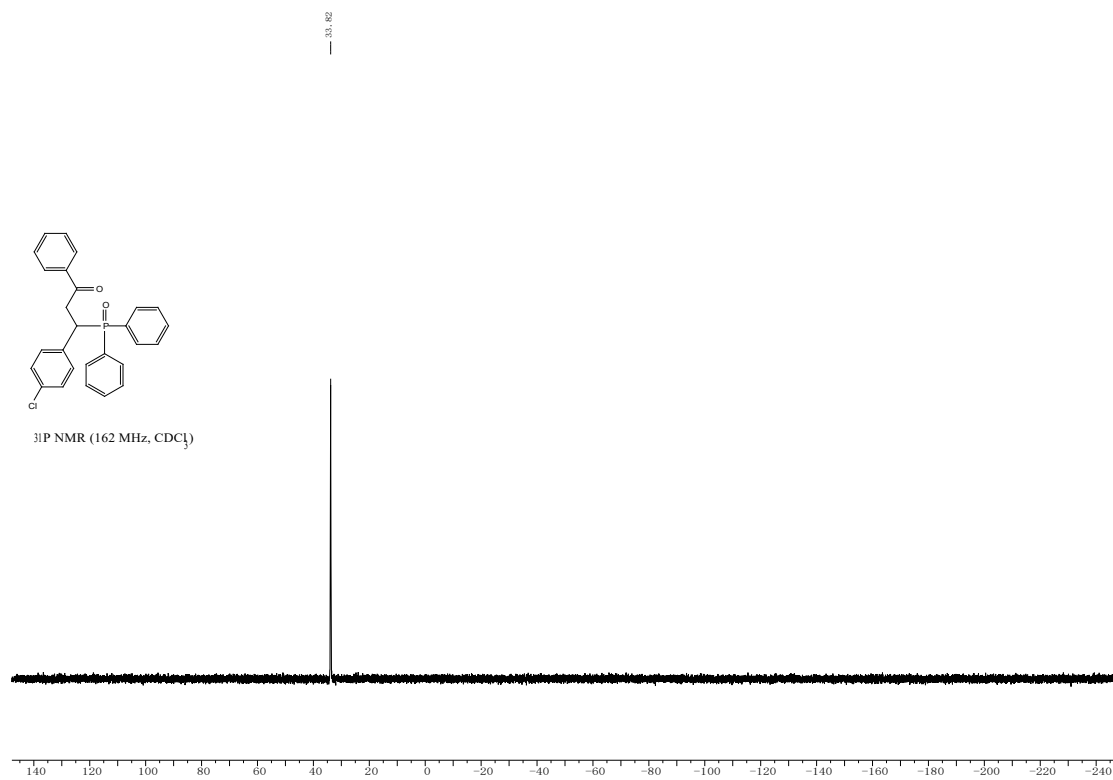

**Figure S10.**  $^1\text{H}$  NMR,  $^{13}\text{C}$  NMR and  $^{31}\text{P}$  NMR spectra of **3g**.



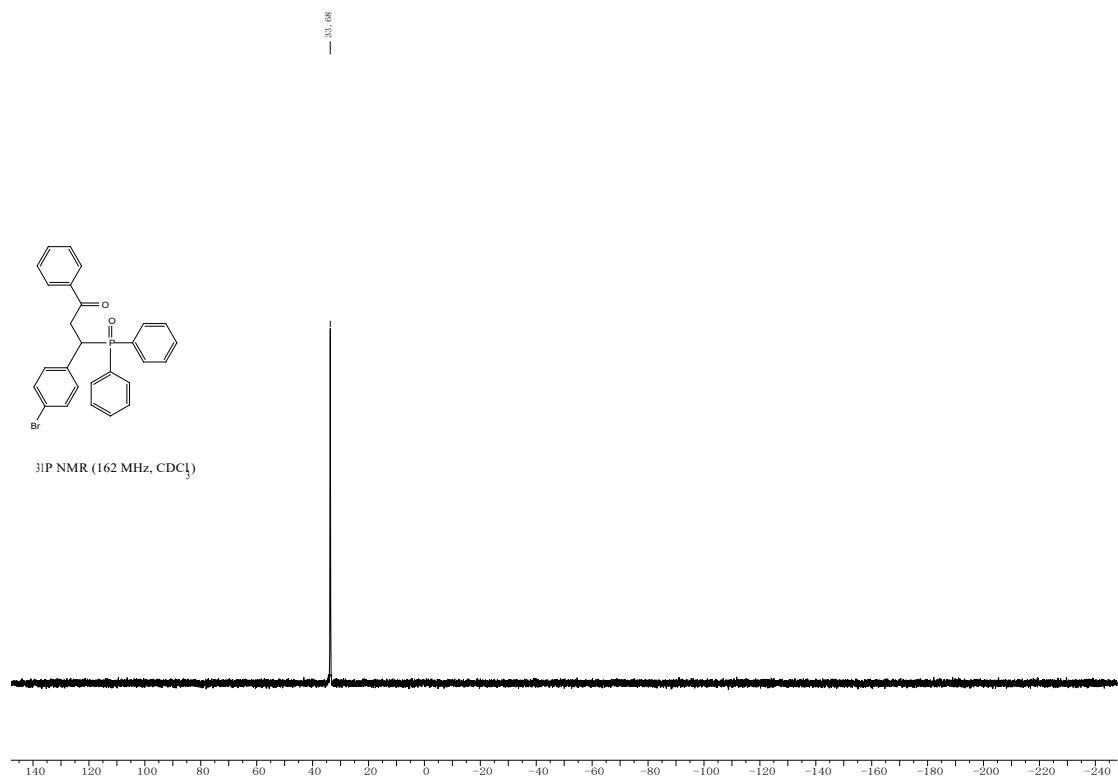

**Figure S11.**  $^1\text{H}$  NMR,  $^{13}\text{C}$  NMR and  $^{31}\text{P}$  NMR spectra of **3h**.



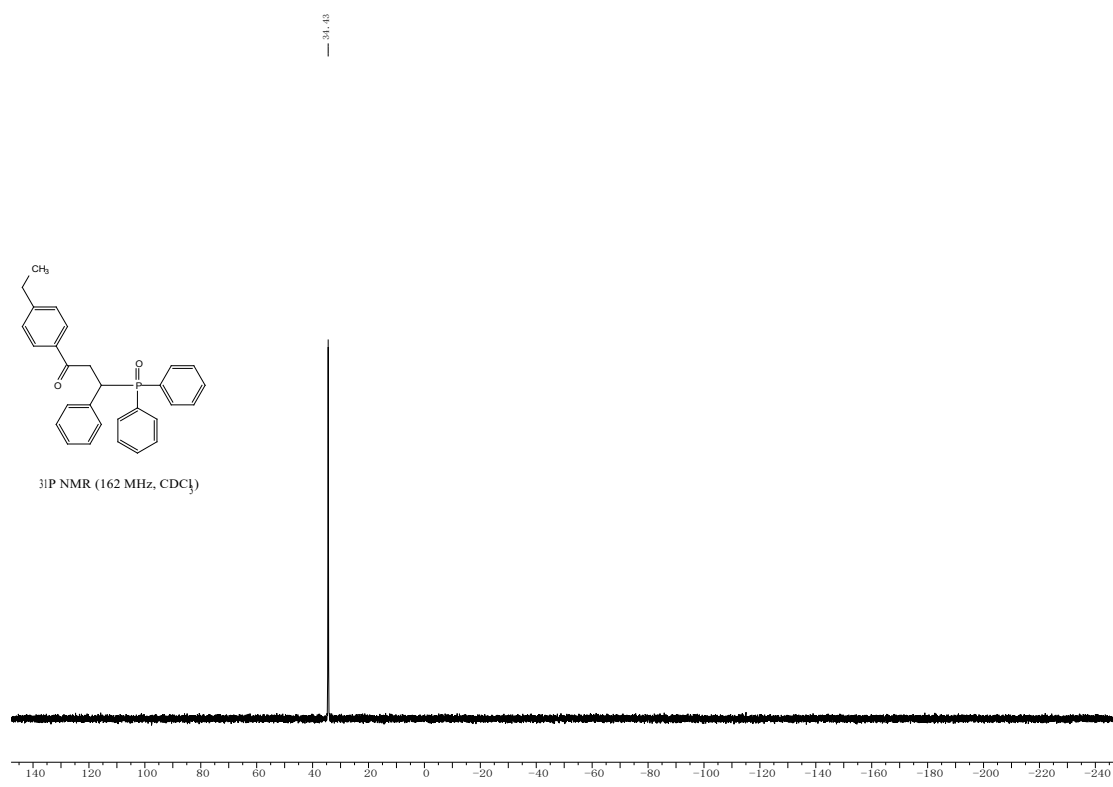

**Figure S12.**  $^1\text{H}$  NMR,  $^{13}\text{C}$  NMR and  $^{31}\text{P}$  NMR spectra of **3i**.

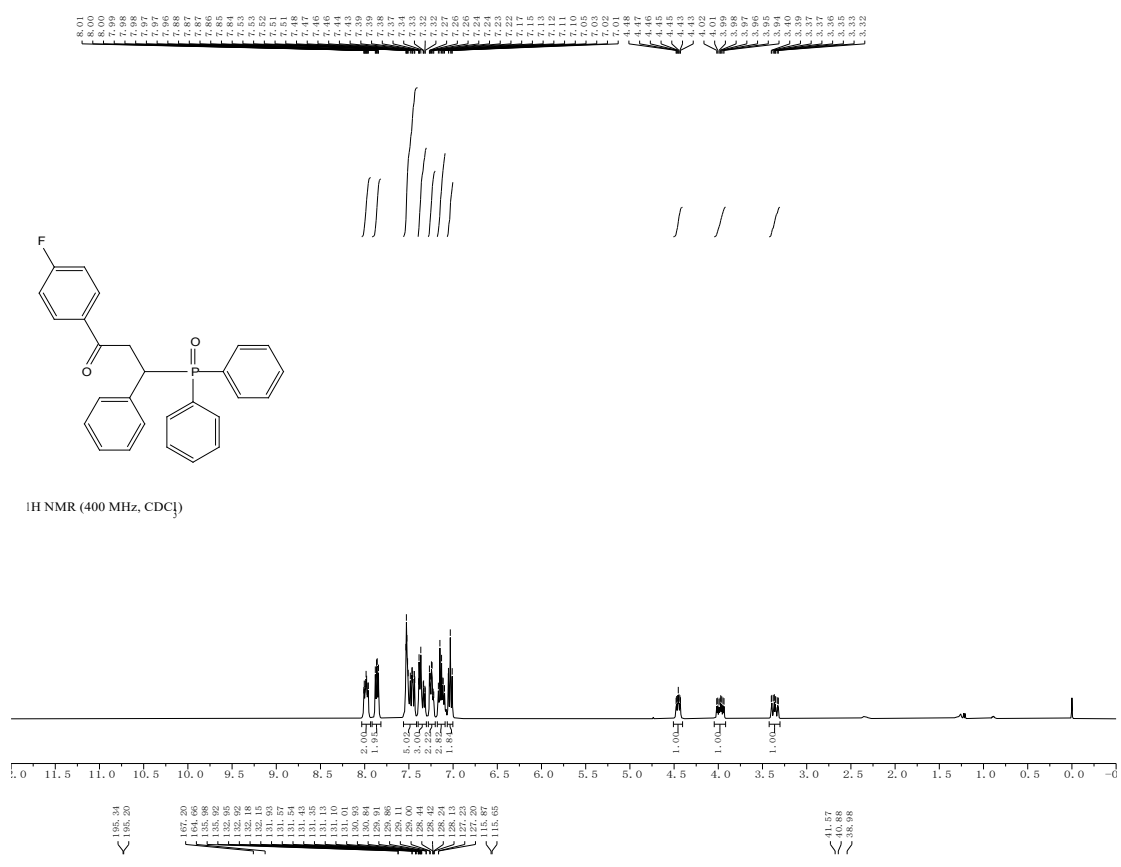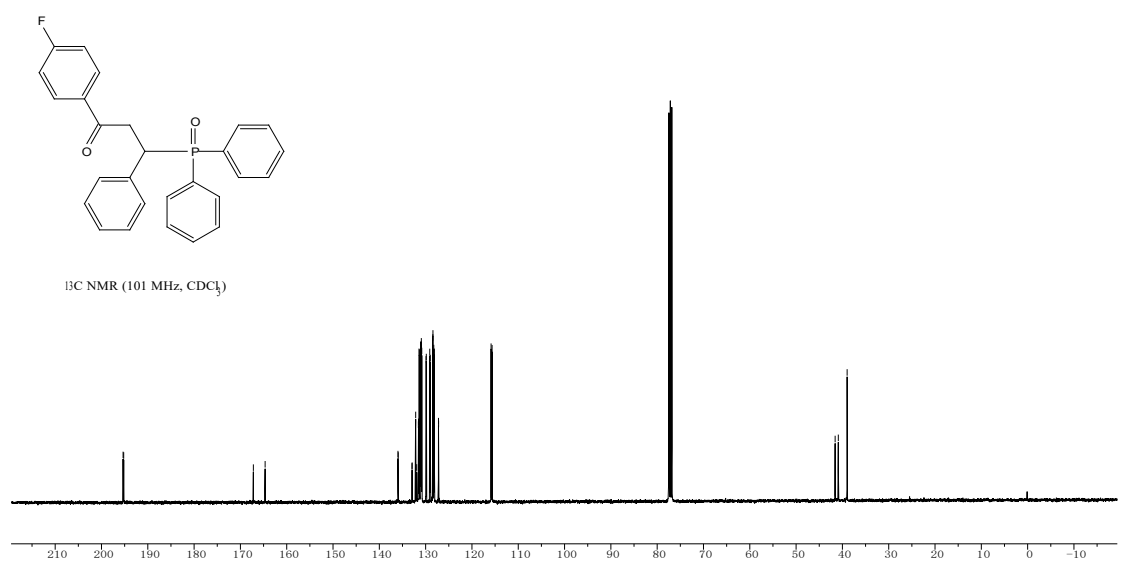

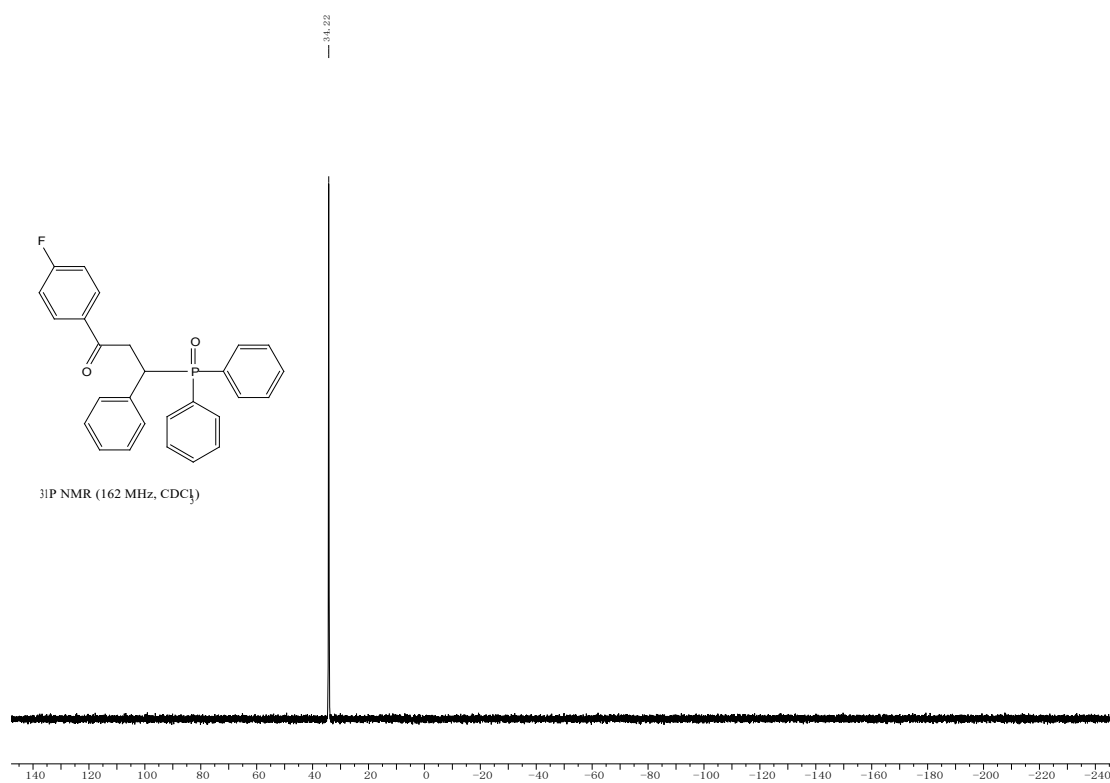

**Figure S13.**  $^1\text{H}$  NMR,  $^{13}\text{C}$  NMR and  $^{31}\text{P}$  NMR spectra of **3j**.





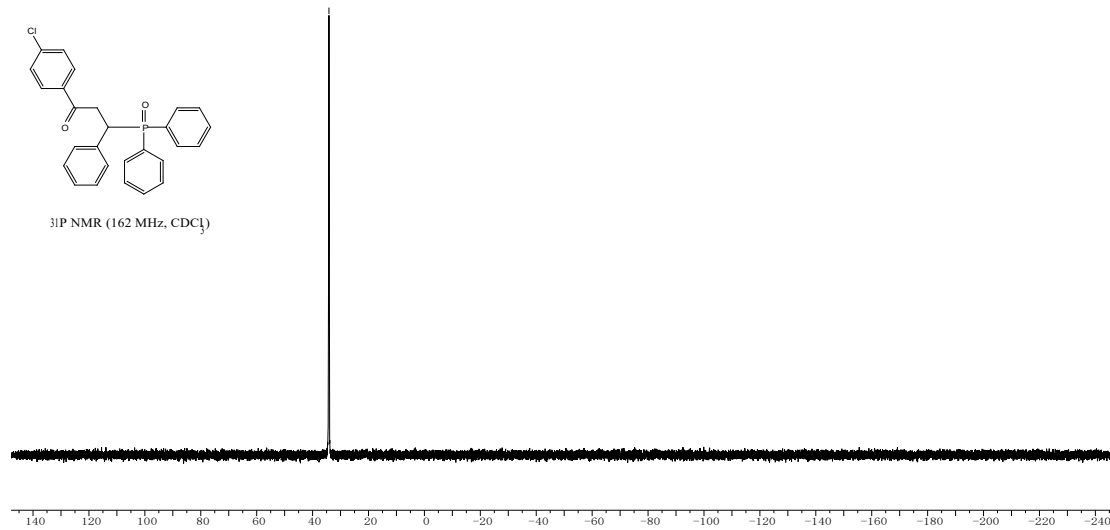

**Figure S14.**  $^1\text{H}$  NMR,  $^{13}\text{C}$  NMR and  $^{31}\text{P}$  NMR spectra of **3k**.

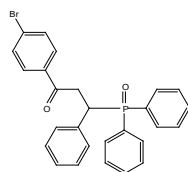

<sup>1</sup>H NMR (400 MHz, CDCl<sub>3</sub>)

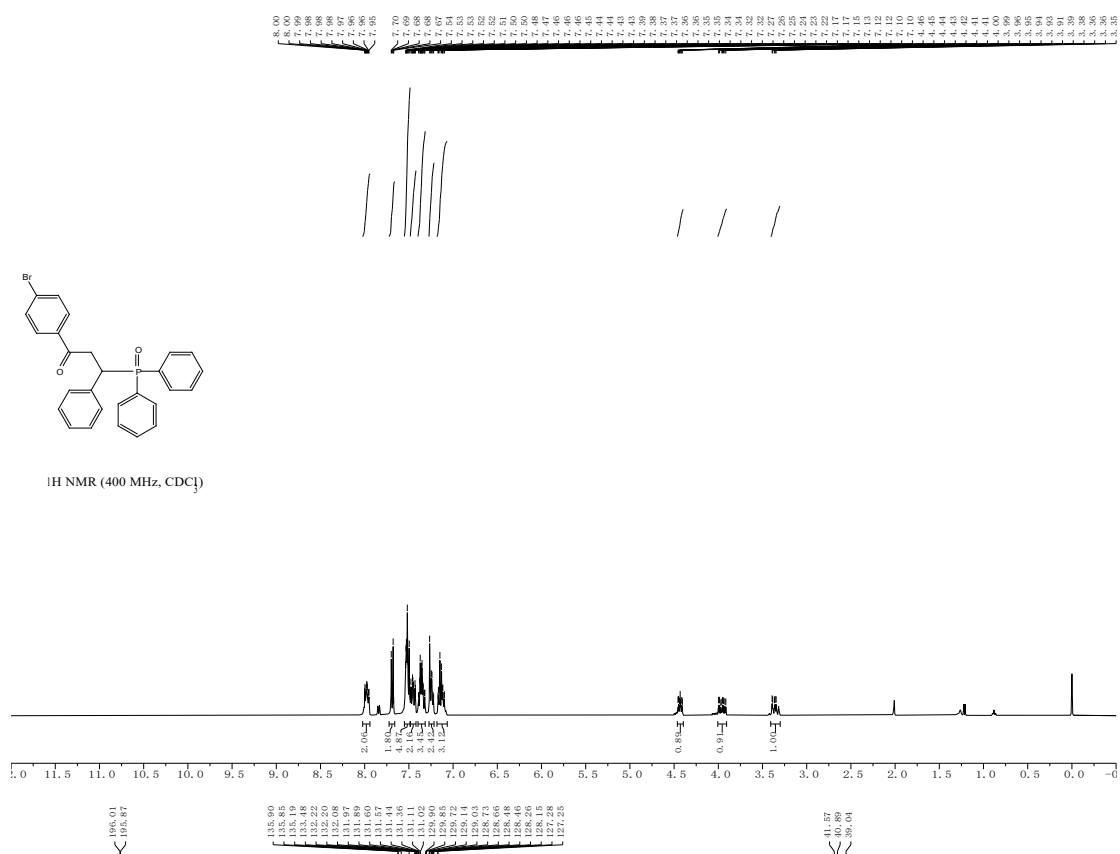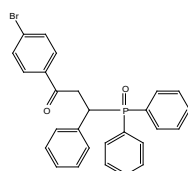

<sup>13</sup>C NMR (101 MHz, CDCl<sub>3</sub>)

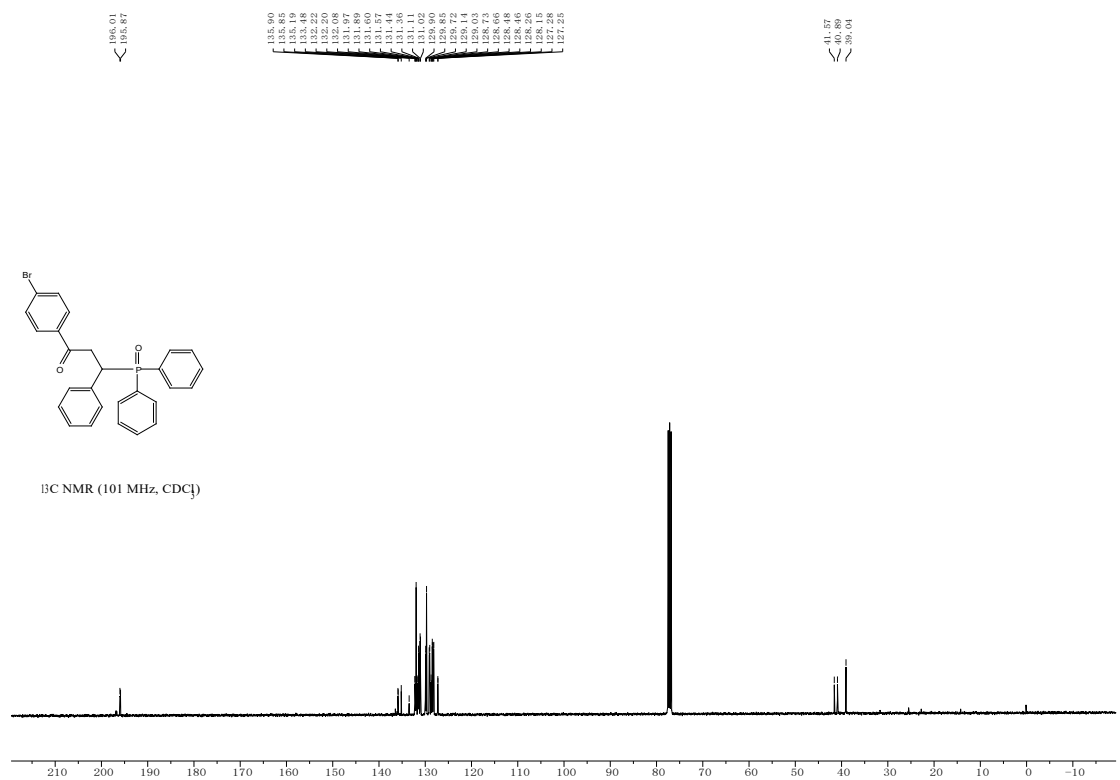

— 31.16

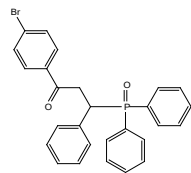

$^{31}\text{P}$  NMR (162 MHz,  $\text{CDCl}_3$ )

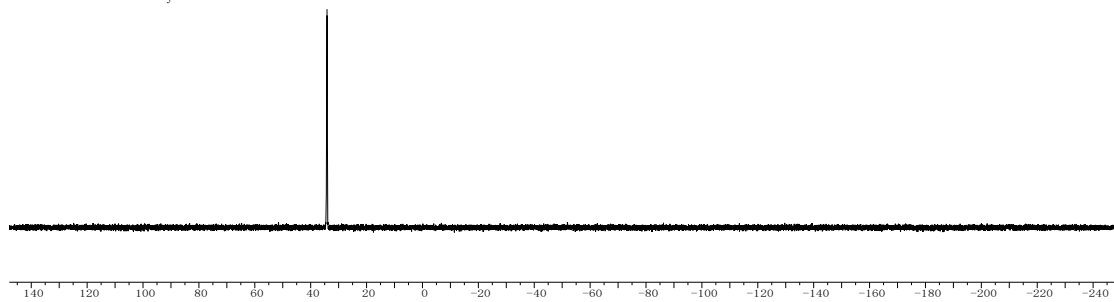

**Figure S15.**  $^1\text{H}$  NMR,  $^{13}\text{C}$  NMR and  $^{31}\text{P}$  NMR spectra of **31**.



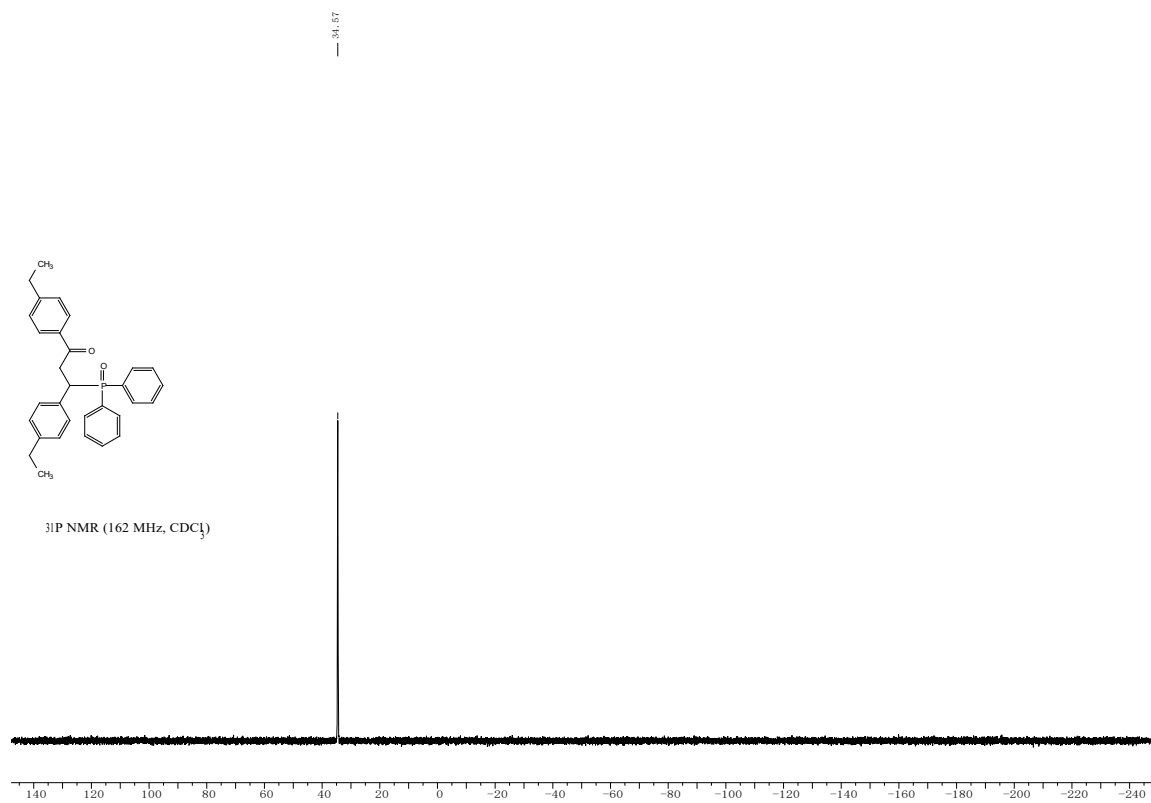

**Figure S16.**  $^1\text{H}$  NMR,  $^{13}\text{C}$  NMR and  $^{31}\text{P}$  NMR spectra of **3m**.



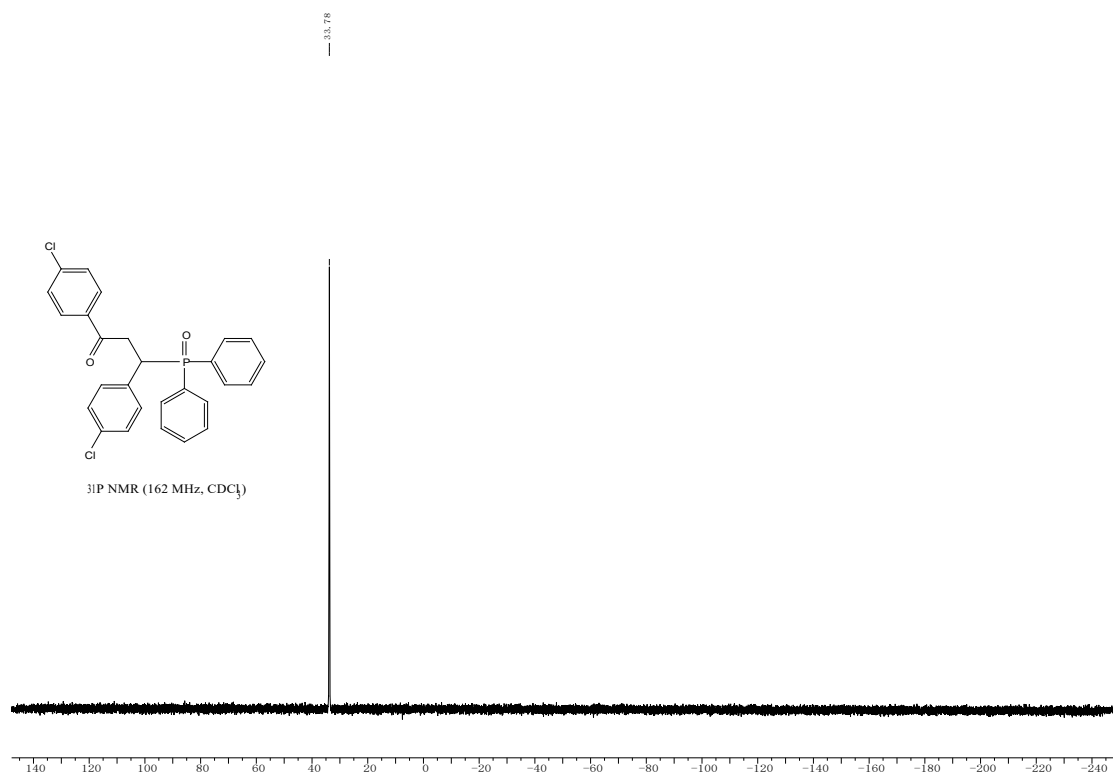

**Figure S17.**  $^1\text{H}$  NMR,  $^{13}\text{C}$  NMR and  $^{31}\text{P}$  NMR spectra of **3n**.

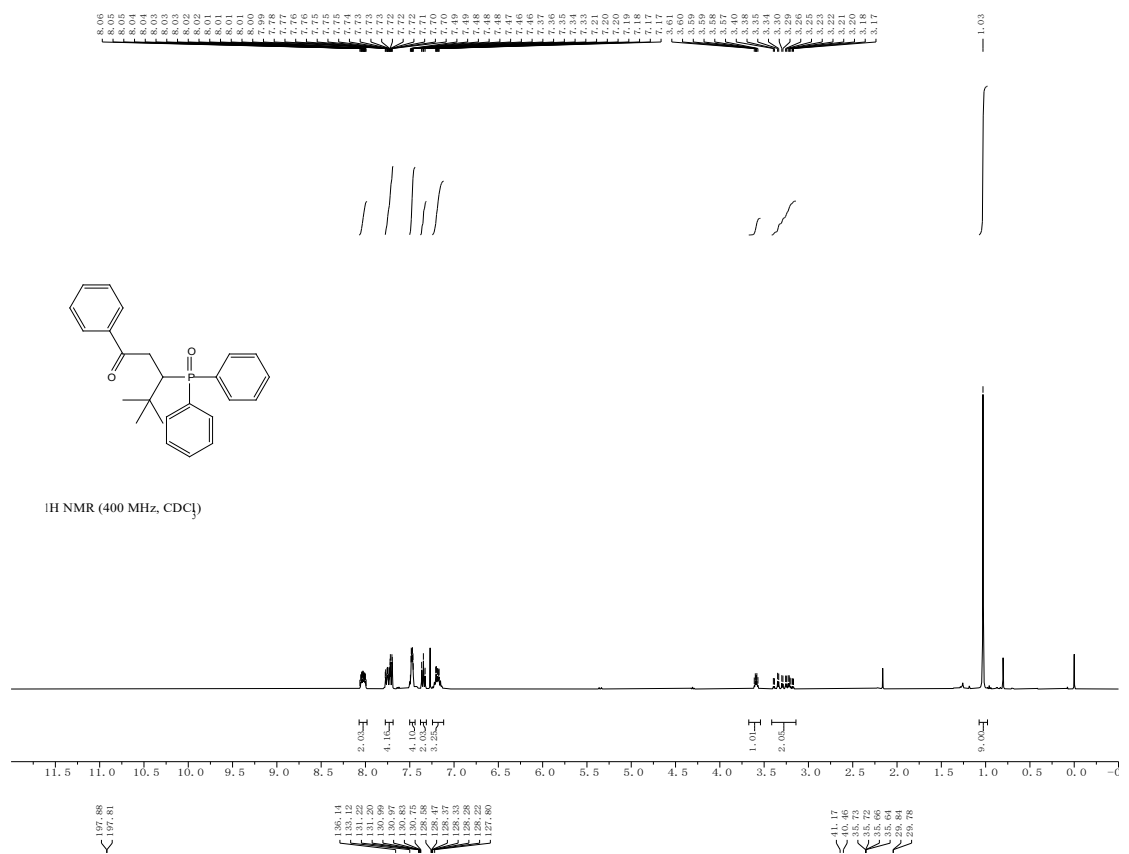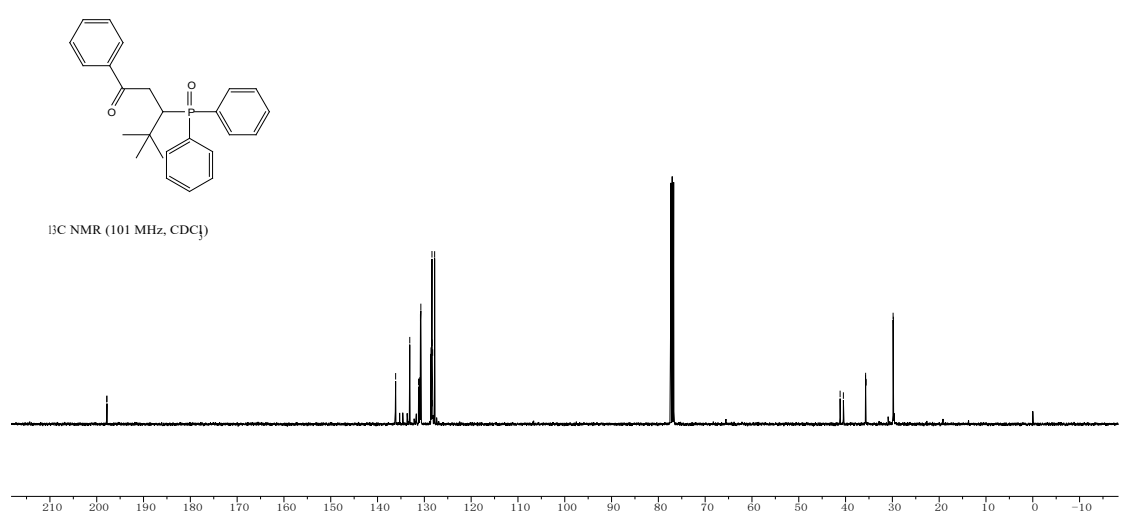



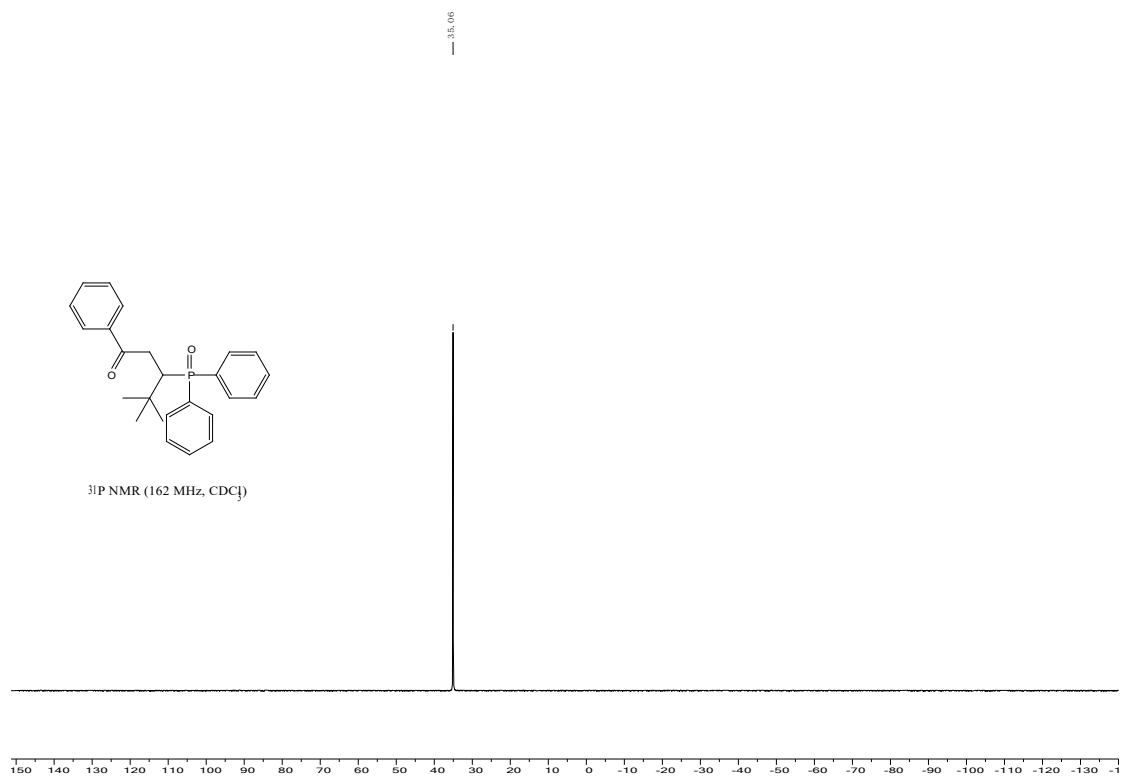

**Figure S18.**  $^1\text{H}$  NMR,  $^{13}\text{C}$  NMR and  $^{31}\text{P}$  NMR spectra of **3o**.



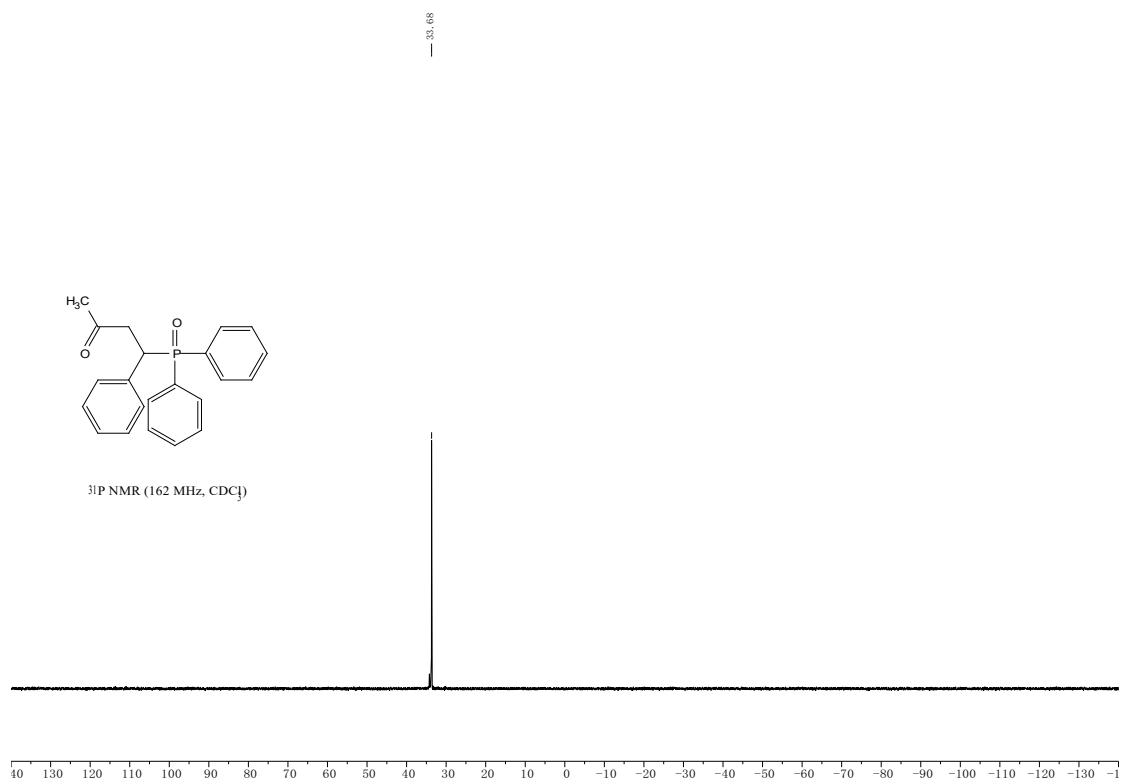

**Figure S19.** <sup>1</sup>H NMR, <sup>13</sup>C NMR and <sup>31</sup>P NMR spectra of **3p**.



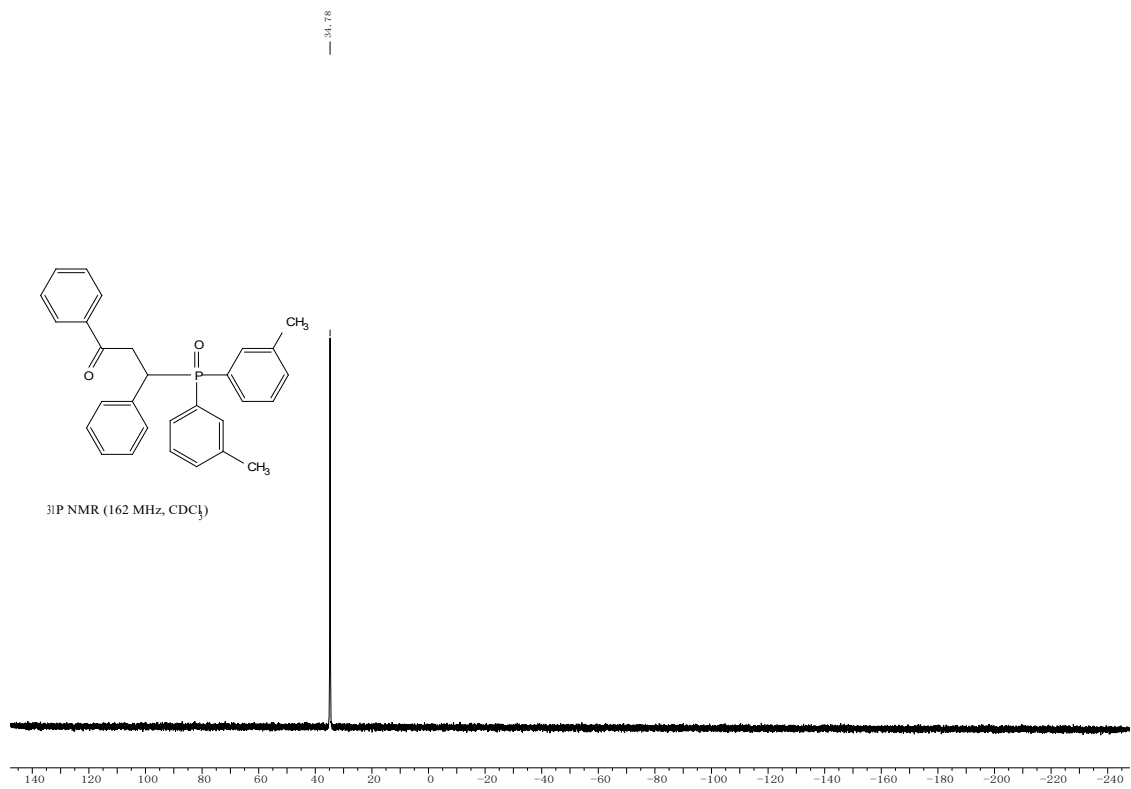

Figure S20.  $^1\text{H}$  NMR,  $^{13}\text{C}$  NMR and  $^{31}\text{P}$  NMR spectra of **3r**.

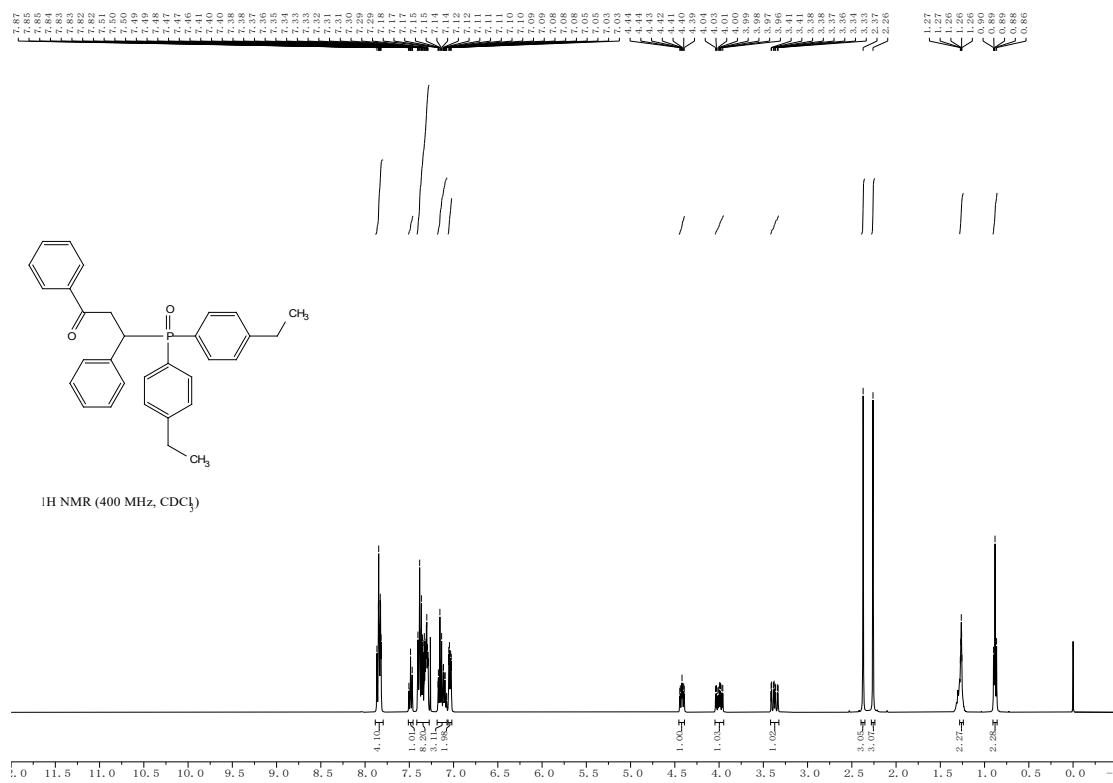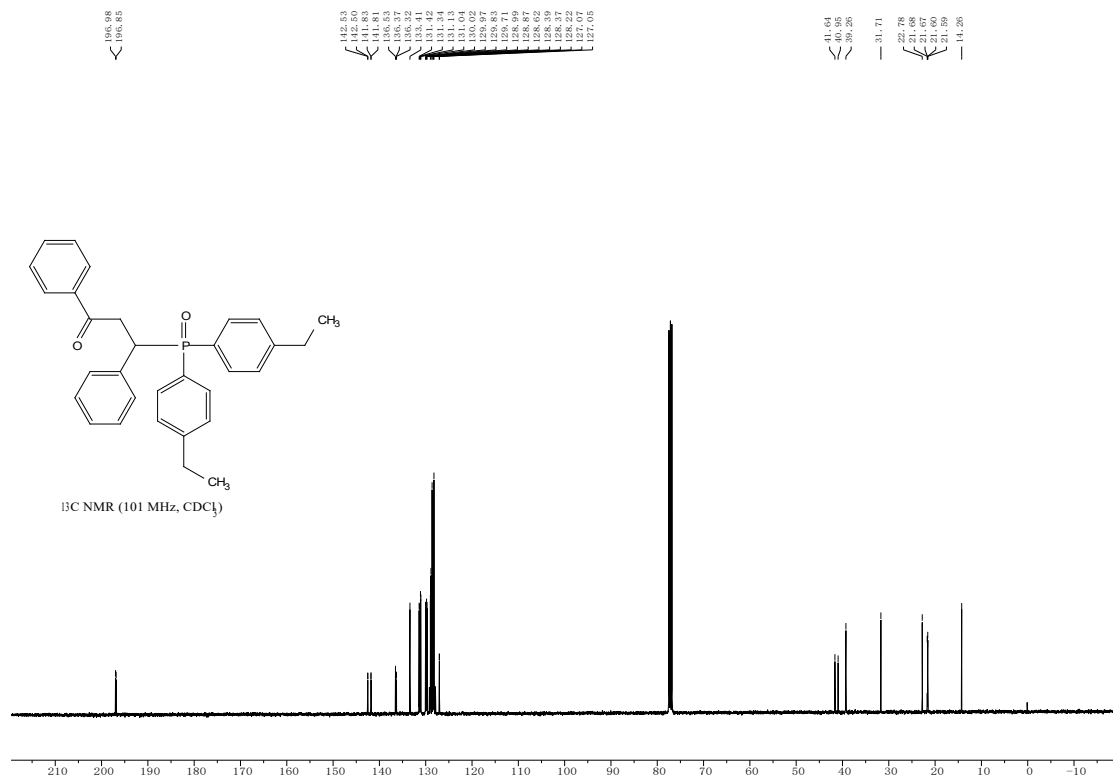

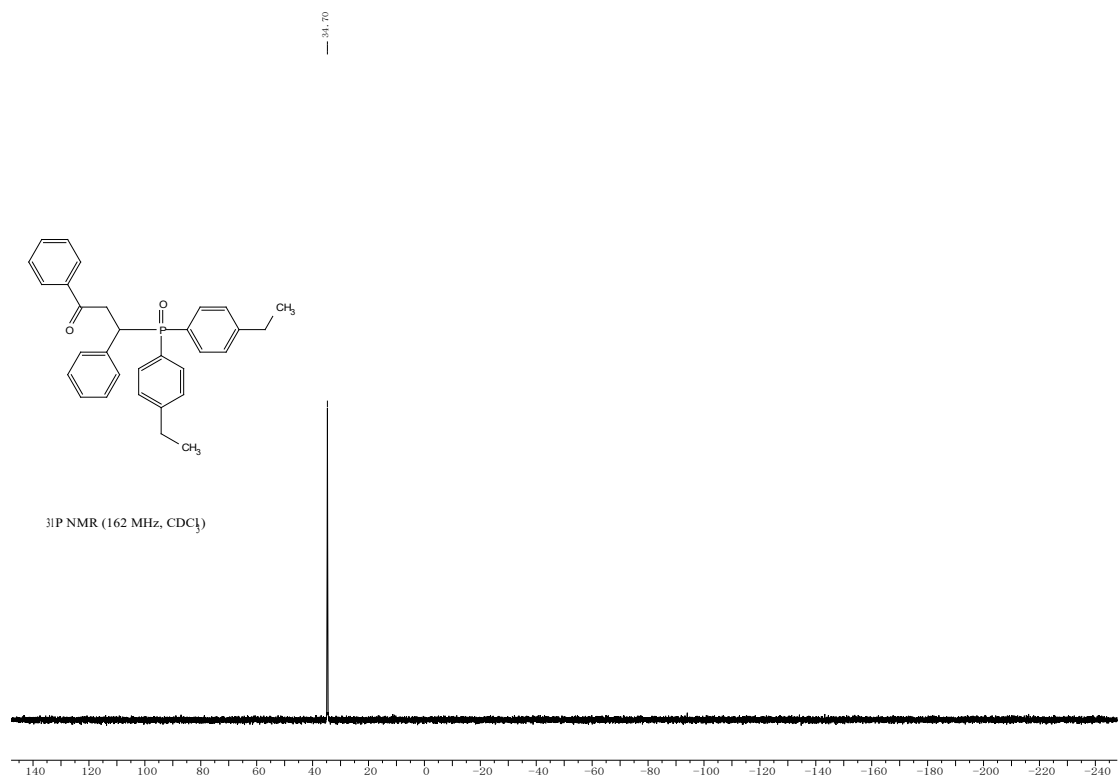

**Figure S21.** <sup>1</sup>H NMR, <sup>13</sup>C NMR and <sup>31</sup>P NMR spectra of 3s.





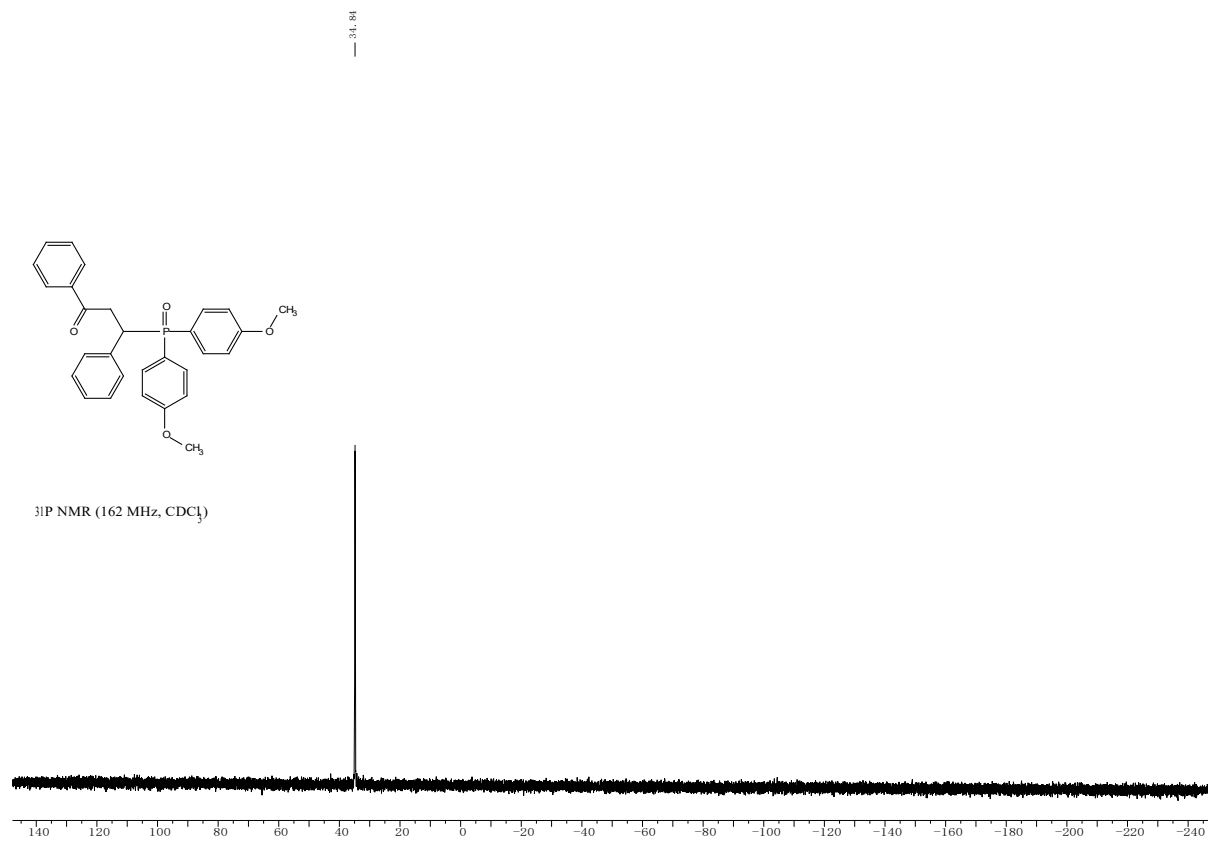

**Figure S22.**  $^1\text{H}$  NMR,  $^{13}\text{C}$  NMR and  $^{31}\text{P}$  NMR spectra of **3t**.



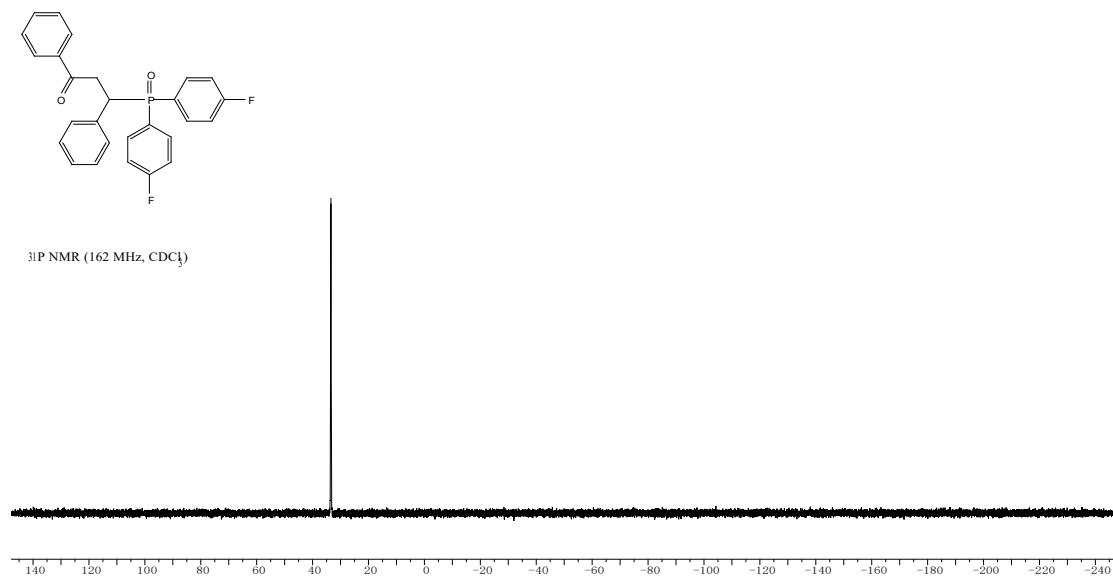

**Figure S23.**  $^1\text{H}$  NMR,  $^{13}\text{C}$  NMR and  $^{31}\text{P}$  NMR Spectra of **3u**.



— 43.56

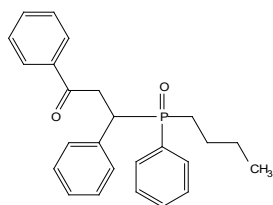

<sup>31</sup>P NMR (162 MHz, CDCl<sub>3</sub>)

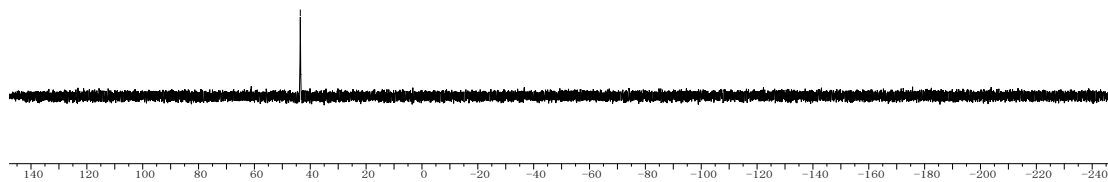

**Figure S24.** <sup>1</sup>H NMR, <sup>13</sup>C NMR and <sup>31</sup>P NMR Spectra of **3v**.
